# Supplementary material for: Proteomic Profiling Reveals Specific Molecular Hallmarks of the Pig Claustrum
Source: Mol Neurobiol. 2023 Apr 24;60(8):4336–58. doi: 10.1007/s12035-023-03347-2 (PMC10293365; doi:10.1007/s12035-023-03347-2)
Supplement: Supplementary file 1 — Supplementary Table [file 12035_2023_3347_MOESM1_ESM.xlsx]

## Sheet: Annotation
Gene	original_id	Cl_vs_Ins	Cl_vs_Put	Gene ID	Type	Tax ID	Homologene Gene ID	Homologene Gene Tax ID	Gene Symbol	Description	Biological Process (GO)	Kinase Class (UniProt)	Protein Function (Protein Atlas)	Subcellular Location (Protein Atlas)	Drug (DrugBank)	Canonical Pathways_x000D_	Hallmark Gene Sets_x000D_	GO:0055086 nucleobase-containing small mo	hsa01200 Carbon metabolism	GO:0099504 synaptic vesicle cycle	GO:0044282 small molecule catabolic proce	GO:0099536 synaptic signaling	GO:0043254 regulation of protein-containi	R-HSA-390450 Folding of actin by CCT/TriC	R-HSA-112315 Transmission across Chemical S	R-HSA-437239 Recycling pathway of L1	GO:0021762 substantia nigra development	GO:0031175 neuron projection development	GO:0061024 membrane organization	M275 PID ALPHA SYNUCLEIN PATHWAY	hsa00020 Citrate cycle (TCA cycle)	WP2371 Parkinson's disease pathway	R-HSA-3371556 Cellular response to heat stre	R-HSA-5653656 Vesicle-mediated transport	GO:0048168 regulation of neuronal synapti	GO:0050806 positive regulation of synapti	GO:0043604 amide biosynthetic process	TotalEvidenceCount
5864	RAB3A	1	1	5864	Gene_ID	H. sapiens	5864	H. sapiens	RAB3A	RAB3A, member RAS oncogene family	GO:0061670 evoked neurotransmitter secretion;GO:1905684 regulation of plasma membrane repair;GO:0050975 sensory perception of touch		Predicted intracellular proteins	Nucleoplasm (Approved); Additional: Centrosome;Cytosol				0	0	1	0	1	1	1	1	0	0	1	1	0	0	0	1	1	1	0	0	0
7531	YWHAE	1	1	7531	Gene_ID	H. sapiens	7531	H. sapiens	YWHAE	tyrosine 3-monooxygenase/tryptophan 5-monooxygenase activation protein epsilon	GO:0003064 regulation of heart rate by hormone;GO:1902309 negative regulation of peptidyl-serine dephosphorylation;GO:1902308 regulation of peptidyl-serine dephosphorylation		Human disease related genes:Congenital malformations:Congenital malformations of the nervous system; Predicted intracellular proteins; Cancer-related genes:Candidate cancer biomarkers	Cytosol (Supported)	Fusicoccin; Phenethyl Isothiocyanate	(M199)PID P38 MK2 PATHWAY; (M247)PID INSULIN GLUCOSE PATHWAY; (M163)PID LIS1 PATHWAY	(M5893)HALLMARK MITOTIC SPINDLE; (M5926)HALLMARK MYC TARGETS V1	0	0	0	0	0	0	1	1	0	1	0	0	1	0	0	1	1	1	0	0	0
4905	NSF	1	1	4905	Gene_ID	H. sapiens	4905	H. sapiens	NSF	N-ethylmaleimide sensitive factor, vesicle fusing ATPase	GO:0035494 SNARE complex disassembly;GO:0001921 positive regulation of receptor recycling;GO:0001919 regulation of receptor recycling		Enzymes; ENZYME proteins:Hydrolases; Transporters:Transporter channels and pores; Predicted intracellular proteins	Cytosol (Supported); Additional: Golgi apparatus	1-Ethyl-Pyrrolidine-2,5-Dione			0	0	0	0	1	0	0	1	0	0	0	1	1	0	0	1	1	0	0	0	0
1428	CRYM	1	1	1428	Gene_ID	H. sapiens	1428	H. sapiens	CRYM	crystallin mu	GO:0006554 lysine catabolic process;GO:0006553 lysine metabolic process;GO:0070327 thyroid hormone transport		Human disease related genes:Nervous system diseases:Ear disease; ENZYME proteins:Oxidoreductases; Disease related genes; Potential drug targets; Enzymes; Predicted intracellular proteins	Cytosol (Supported)	NRP409			0	0	1	1	0	0	0	0	0	0	0	0	0	0	0	0	0	0	0	0	0
60	ACTB	1	1	60	Gene_ID	H. sapiens	60	H. sapiens	ACTB	actin beta	GO:0051623 positive regulation of norepinephrine uptake;GO:0072749 cellular response to cytochalasin B;GO:1901328 response to cytochalasin B		Human disease related genes:Immune system diseases:Primary immunodeficiency; Human disease related genes:Congenital malformations:Other congenital malformations; Predicted intracellular proteins; Disease related genes		Quercetin; Phenethyl Isothiocyanate	(M5493)WNT SIGNALING	(M5915)HALLMARK APICAL JUNCTION	0	0	1	0	1	1	1	1	1	1	1	0	1	0	0	1	1	1	0	0	0
2783	GNB2	1	1	2783	Gene_ID	H. sapiens	2783	H. sapiens	GNB2	G protein subunit beta 2	GO:0007186 G protein-coupled receptor signaling pathway;GO:0007165 signal transduction;GO:0023052 signaling		Transporters:Accessory Factors Involved in Transport; RAS pathway related proteins; Predicted intracellular proteins	Plasma membrane (Supported)			(M5946)HALLMARK COAGULATION; (M5921)HALLMARK COMPLEMENT	0	0	0	0	0	0	1	1	0	0	0	0	0	0	0	0	0	1	0	0	0
56922	MCCC1	1	1	56922	Gene_ID	H. sapiens	56922	H. sapiens	MCCC1	methylcrotonyl-CoA carboxylase subunit 1	GO:0006768 biotin metabolic process;GO:0006552 leucine catabolic process;GO:0006551 leucine metabolic process		ENZYME proteins:Ligase; Human disease related genes:Congenital disorders of metabolism:Congenital disorders of amino acid metabolism; Disease related genes; Potential drug targets; Enzymes; Predicted intracellular proteins	Mitochondria (Supported)	Biotin		(M5905)HALLMARK ADIPOGENESIS	1	0	0	1	0	0	0	0	0	0	0	0	0	0	0	0	0	0	0	0	0
6620	SNCB	1	1	6620	Gene_ID	H. sapiens	6620	H. sapiens	SNCB	synuclein beta	GO:0042417 dopamine metabolic process;GO:0006584 catecholamine metabolic process;GO:0009712 catechol-containing compound metabolic process		Predicted intracellular proteins; Transporters:Transporter channels and pores; Human disease related genes:Nervous system diseases:Neurodegenerative diseases				(M5956)HALLMARK KRAS SIGNALING DN	0	0	1	0	1	0	0	0	1	0	0	0	1	0	0	1	0	0	0	0	0
2023	ENO1	1	1	2023	Gene_ID	H. sapiens	2023	H. sapiens	ENO1	enolase 1	GO:1903297 regulation of hypoxia-induced intrinsic apoptotic signaling pathway;GO:1903298 negative regulation of hypoxia-induced intrinsic apoptotic signaling pathway;GO:0010756 positive regulation of plasminogen activation		Enzymes; ENZYME proteins:Lyases; Predicted intracellular proteins; Cancer-related genes:Candidate cancer biomarkers	Cytosol;Plasma membrane (Enhanced)	Zinc; Copper; Artenimol; Zinc acetate; Zinc chloride; Zinc sulfate, unspecified form	(M17)PID NOTCH PATHWAY; (M255)PID HIF1 TFPATHWAY; (M66)PID MYC ACTIV PATHWAY	(M5891)HALLMARK HYPOXIA; (M5924)HALLMARK MTORC1 SIGNALING; (M5937)HALLMARK GLYCOLYSIS	1	1	0	1	0	0	0	0	0	0	0	0	1	0	0	1	0	0	0	0	0
3098	HK1	1	1	3098	Gene_ID	H. sapiens	3098	H. sapiens	HK1	hexokinase 1	GO:0072656 maintenance of protein location in mitochondrion;GO:0006013 mannose metabolic process;GO:0006735 NADH regeneration		Human disease related genes:Congenital malformations:Congenital malformations of the nervous system; Cancer-related genes:Candidate cancer biomarkers; Human disease related genes:Cardiovascular diseases:Hematologic diseases; Human disease related genes:Nervous system diseases:Eye disease; Disease related genes; Potential drug targets; Enzymes; Predicted intracellular proteins; ENZYME proteins:Tra…	Mitochondria (Supported)	alpha-D-glucose 6-phosphate; Beta-D-Glucose; Phosphoaminophosphonic Acid-Adenylate Ester; Lonidamine	(M255)PID HIF1 TFPATHWAY	(M5891)HALLMARK HYPOXIA	1	1	0	1	0	0	0	0	0	0	0	0	1	1	0	0	0	0	0	0	0
8895	CPNE3	1	1	8895	Gene_ID	H. sapiens	8895	H. sapiens	CPNE3	copine 3	GO:0038128 ERBB2 signaling pathway;GO:0038127 ERBB signaling pathway;GO:0071277 cellular response to calcium ion		Predicted intracellular proteins	Cytosol;Nucleoplasm (Supported)				0	0	0	0	0	0	0	0	0	0	0	0	0	0	0	0	0	0	0	0	0
815	CAMK2A	1	1	815	Gene_ID	H. sapiens	815	H. sapiens	CAMK2A	calcium/calmodulin dependent protein kinase II alpha	GO:1990443 peptidyl-threonine autophosphorylation;GO:2000124 regulation of endocannabinoid signaling pathway;GO:0038166 angiotensin-activated signaling pathway	CAMK Ser/Thr protein kinase family	Human disease related genes:Other diseases:Mental and behavioural disorders; Kinases:CAMK Ser/Thr protein kinases; Disease related genes; Potential drug targets; Enzymes; ENZYME proteins:Transferases	Plasma membrane (Approved); Additional: Cell Junctions;Cytosol	Hexatantalum Dodecabromide; 1,4-Dithiothreitol; (2Z,3E)-2,3'-biindole-2',3(1H,1'H)-dione 3-{O-[(3R)-3,4-dihydroxybutyl]oxime}; Fostamatinib	(M23)PID WNT NONCANONICAL PATHWAY; (M108)PID NETRIN PATHWAY; (M271)PID PI3K PLC TRK PATHWAY		0	1	0	1	1	0	0	1	1	0	1	1	1	1	1	1	0	1	1	1	0
56904	SH3GLB2	1	1	56904	Gene_ID	H. sapiens	56904	H. sapiens	SH3GLB2	SH3 domain containing GRB2 like, endophilin B2	GO:0061024 membrane organization;GO:0016043 cellular component organization;GO:0071840 cellular component organization or biogenesis		Predicted intracellular proteins	Cytosol (Supported); Additional: Nucleoplasm				0	0	0	0	0	0	0	0	1	0	0	1	0	0	0	0	0	0	0	0	0
6622	SNCA	1	1	6622	Gene_ID	H. sapiens	6622	H. sapiens	SNCA	synuclein alpha	GO:0035543 positive regulation of SNARE complex assembly;GO:0051585 negative regulation of dopamine uptake involved in synaptic transmission;GO:0051945 negative regulation of catecholamine uptake involved in synaptic transmission		Human disease related genes:Nervous system diseases:Neurodegenerative diseases; Disease related genes; Potential drug targets; Transporters:Transporter channels and pores; Predicted intracellular proteins		Resveratrol; Copper	(M275)PID ALPHA SYNUCLEIN PATHWAY	(M5945)HALLMARK HEME METABOLISM	1	1	1	0	1	1	1	1	1	0	0	1	1	1	1	0	0	1	1	0	0
7086	tkt	0	1	7086	Gene_ID	H. sapiens	7086	H. sapiens	TKT	transketolase	GO:0046166 glyceraldehyde-3-phosphate biosynthetic process;GO:0019682 glyceraldehyde-3-phosphate metabolic process;GO:0009052 pentose-phosphate shunt, non-oxidative branch		Human disease related genes:Congenital disorders of metabolism:Congenital disorders of carbohydrate metabolism; Disease related genes; Potential drug targets; Enzymes; Predicted intracellular proteins; ENZYME proteins:Transferases	Nucleoplasm (Enhanced)	Copper		(M5905)HALLMARK ADIPOGENESIS	1	1	0	1	0	0	0	1	0	0	0	0	0	0	0	0	0	0	0	0	0
55753	OGDHL	0	1	55753	Gene_ID	H. sapiens	55753	H. sapiens	OGDHL	oxoglutarate dehydrogenase L	GO:0006103 2-oxoglutarate metabolic process;GO:0006099 tricarboxylic acid cycle;GO:0006096 glycolytic process		Enzymes; Citric acid cycle related proteins; Predicted intracellular proteins; ENZYME proteins:Oxidoreductases	Nucleoli fibrillar center (Approved)				1	1	0	1	0	0	0	0	0	0	0	0	0	1	0	0	0	0	0	0	0
7415	VCP	0	1	7415	Gene_ID	H. sapiens	7415	H. sapiens	VCP	valosin containing protein	GO:0042728 flavin-containing compound catabolic process;GO:0072389 flavin adenine dinucleotide catabolic process;GO:1903007 positive regulation of Lys63-specific deubiquitinase activity		ENZYME proteins:Hydrolases; Predicted intracellular proteins; Human disease related genes:Musculoskeletal diseases:Muscular diseases; Disease related genes; Potential drug targets; Enzymes; Transporters:Primary Active Transporters; Human disease related genes:Nervous system diseases:Neurodegenerative diseases	Cytosol;Nucleoplasm (Enhanced)	Phosphoaminophosphonic Acid-Adenylate Ester; Phenethyl Isothiocyanate			1	1	0	0	0	1	1	0	0	0	0	0	1	0	1	1	0	0	0	0	0
2746	GLUD1	0	1	2746	Gene_ID	H. sapiens	2746	H. sapiens	GLUD1	glutamate dehydrogenase 1	GO:0006537 glutamate biosynthetic process;GO:0006538 glutamate catabolic process;GO:0043650 dicarboxylic acid biosynthetic process		ENZYME proteins:Oxidoreductases; Human disease related genes:Congenital disorders of metabolism:Congenital disorders of amino acid metabolism; Disease related genes; Potential drug targets; Enzymes; Predicted intracellular proteins; Human disease related genes:Congenital disorders of metabolism:Other congenital disorders of metabolism	Mitochondria (Supported)	Glutamic acid; NADH; Hexachlorophene; Guanosine-5'-Triphosphate; Aluminum chloride		(M5936)HALLMARK OXIDATIVE PHOSPHORYLATION	0	1	0	1	1	0	1	0	0	1	0	0	0	0	0	0	0	0	0	0	0
1400	CRMP1	0	1	1400	Gene_ID	H. sapiens	1400	H. sapiens	CRMP1	collapsin response mediator protein 1	GO:1904530 negative regulation of actin filament binding;GO:1904617 negative regulation of actin binding;GO:1904529 regulation of actin filament binding		Predicted intracellular proteins	Centrosome (Supported); Additional: Cytosol			(M5919)HALLMARK HEDGEHOG SIGNALING	0	0	0	0	0	1	0	0	1	0	1	0	0	0	0	0	0	0	0	0	0
8803	SUCLA2	0	1	8803	Gene_ID	H. sapiens	8803	H. sapiens	SUCLA2	succinate-CoA ligase ADP-forming subunit beta	GO:0006781 succinyl-CoA pathway;GO:0006780 uroporphyrinogen III biosynthetic process;GO:0046502 uroporphyrinogen III metabolic process		ENZYME proteins:Ligase; Disease related genes; Potential drug targets; Enzymes; Citric acid cycle related proteins; Predicted intracellular proteins; Human disease related genes:Congenital disorders of metabolism:Mitochondrial diseases	Mitochondria (Enhanced)			(M5935)HALLMARK FATTY ACID METABOLISM; (M5936)HALLMARK OXIDATIVE PHOSPHORYLATION	1	1	0	1	0	0	0	0	0	0	0	0	0	1	0	0	0	0	0	0	0
27294	DHDH	0	1	27294	Gene_ID	H. sapiens	27294	H. sapiens	DHDH	dihydrodiol dehydrogenase	GO:0042843 D-xylose catabolic process;GO:0042732 D-xylose metabolic process;GO:0019323 pentose catabolic process		Enzymes; Predicted intracellular proteins; ENZYME proteins:Oxidoreductases	Actin filaments;Nucleoplasm (Approved)				0	1	0	1	0	0	0	0	0	0	0	0	0	0	0	0	0	0	0	0	0
4976	OPA1	0	1	4976	Gene_ID	H. sapiens	4976	H. sapiens	OPA1	OPA1 mitochondrial dynamin like GTPase	GO:0097749 membrane tubulation;GO:0000266 mitochondrial fission;GO:0008053 mitochondrial fusion		ENZYME proteins:Hydrolases; Human disease related genes:Nervous system diseases:Eye disease; Disease related genes; Potential drug targets; Enzymes; Transporters:Transporter channels and pores; Predicted intracellular proteins; Human disease related genes:Congenital disorders of metabolism:Mitochondrial diseases	Mitochondria;Nucleoplasm (Supported)			(M5936)HALLMARK OXIDATIVE PHOSPHORYLATION	1	0	1	0	1	1	0	0	0	0	0	1	0	0	0	1	0	1	0	0	0
1653	DDX1	1	0	1653	Gene_ID	H. sapiens	1653	H. sapiens	DDX1	DEAD-box helicase 1	GO:0002733 regulation of myeloid dendritic cell cytokine production;GO:0002735 positive regulation of myeloid dendritic cell cytokine production;GO:1903608 protein localization to cytoplasmic stress granule		Enzymes; ENZYME proteins:Hydrolases; Predicted intracellular proteins	Nucleoplasm (Supported); Additional: Cytosol				0	0	0	0	0	0	0	0	0	0	0	0	0	0	0	0	0	0	0	0	0
6456	SH3GL2	0	1	6456	Gene_ID	H. sapiens	6456	H. sapiens	SH3GL2	SH3 domain containing GRB2 like 2, endophilin A1	GO:1905604 negative regulation of blood-brain barrier permeability;GO:0016191 synaptic vesicle uncoating;GO:1905603 regulation of blood-brain barrier permeability		Predicted intracellular proteins	Microtubules (Approved); Additional: Cytokinetic bridge;Mitotic spindle		(M214)PID ERBB1 INTERNALIZATION PATHWAY; (M12)PID RHOA PATHWAY; (M48)PID MET PATHWAY	(M5910)HALLMARK PROTEIN SECRETION	0	0	1	0	0	0	0	0	1	0	1	0	1	0	0	0	1	0	0	0	0
7317	UBA1	0	1	7317	Gene_ID	H. sapiens	7317	H. sapiens	UBA1	ubiquitin like modifier activating enzyme 1	GO:0006511 ubiquitin-dependent protein catabolic process;GO:0019941 modification-dependent protein catabolic process;GO:0043632 modification-dependent macromolecule catabolic process		ENZYME proteins:Ligase; Cancer-related genes:Candidate cancer biomarkers; Predicted intracellular proteins; Disease related genes; Potential drug targets; Enzymes; Human disease related genes:Nervous system diseases:Neurodegenerative diseases	Nucleoplasm (Supported)	Hexatantalum Dodecabromide; Quercetin			0	0	0	0	0	0	0	0	0	0	0	0	0	0	1	0	0	0	0	0	0
30844	EHD4	0	1	30844	Gene_ID	H. sapiens	30844	H. sapiens	EHD4	EH domain containing 4	GO:0006907 pinocytosis;GO:0032456 endocytic recycling;GO:0098876 vesicle-mediated transport to the plasma membrane		Predicted intracellular proteins	Plasma membrane (Approved)		(M270)PID MAPK TRK PATHWAY; (M187)PID TRKR PATHWAY		0	0	1	0	1	0	0	0	1	0	0	0	0	0	0	0	0	0	0	0	0
23603	CORO1C	0	1	23603	Gene_ID	H. sapiens	23603	H. sapiens	CORO1C	coronin 1C	GO:0097750 endosome membrane tubulation;GO:0140285 endosome fission;GO:0097749 membrane tubulation		Predicted intracellular proteins					0	0	0	0	1	1	0	0	0	0	0	1	1	0	0	0	0	0	0	0	0
144983	HNRNPA1L2	0	1	144983	Gene_ID	H. sapiens	144983	H. sapiens	HNRNPA1L2	heterogeneous nuclear ribonucleoprotein A1 like 2	GO:0051028 mRNA transport;GO:0050657 nucleic acid transport;GO:0050658 RNA transport		Predicted intracellular proteins					0	0	0	0	0	0	0	0	0	0	0	0	0	0	0	0	0	0	0	0	0
5594	MAPK1	0	1	5594	Gene_ID	H. sapiens	5594	H. sapiens	MAPK1	mitogen-activated protein kinase 1	GO:0019858 cytosine metabolic process;GO:0090170 regulation of Golgi inheritance;GO:0072584 caveolin-mediated endocytosis	CMGC Ser/Thr protein kinase family	FDA approved drug targets:Small molecule drugs; Cancer-related genes:Candidate cancer biomarkers; Human disease related genes:Congenital malformations:Other congenital malformations; Kinases:CMGC Ser/Thr protein kinases; Enzymes; RAS pathway related proteins; Predicted intracellular proteins; ENZYME proteins:Transferases	Cytosol (Supported); Additional: Nuclear speckles	Acetylsalicylic acid; Minocycline; Isoprenaline; Arsenic trioxide; Olomoucine; Phosphonothreonine; Purvalanol; SB220025; Seliciclib; Perifosine; N,N-DIMETHYL-4-(4-PHENYL-1H-PYRAZOL-3-YL)-1H-PYRROLE-2-CARBOXAMIDE; N-BENZYL-4-[4-(3-CHLOROPHENYL)-1H-PYRAZOL-3-YL]-1H-PYRROLE-2-CARBOXAMIDE; (S)-N-(1-(3-CHLORO-4-FLUOROPHENYL)-2-HYDROXYETHYL)-4-(4-(3-CHLOROPHENYL)-1H-PYRAZOL-3-YL)-1H-PYRROLE-2-CARBOXAMI…	(M64)PID S1P S1P4 PATHWAY; (M134)PID TCR RAS PATHWAY; (M120)PID ARF6 DOWNSTREAM PATHWAY	(M5910)HALLMARK PROTEIN SECRETION; (M5923)HALLMARK PI3K AKT MTOR SIGNALING	1	1	0	0	1	1	1	1	1	1	0	0	1	1	1	1	0	0	1	1	0
22933	SIRT2	0	1	22933	Gene_ID	H. sapiens	22933	H. sapiens	SIRT2	sirtuin 2	GO:0061433 cellular response to caloric restriction;GO:0070446 negative regulation of oligodendrocyte progenitor proliferation;GO:2000777 positive regulation of proteasomal ubiquitin-dependent protein catabolic process involved in cellular response to hypoxia		Enzymes; Predicted intracellular proteins; ENZYME proteins:Transferases; Cancer-related genes:Candidate cancer biomarkers	Cytosol;Nucleoli (Supported); Additional: Nucleoplasm	Cambinol	(M32)PID HDAC CLASSIII PATHWAY; (M101)PID HDAC CLASSI PATHWAY	(M5946)HALLMARK COAGULATION; (M5909)HALLMARK MYOGENESIS	0	0	0	0	0	1	1	1	0	1	0	1	1	0	0	0	0	0	1	0	0
2670	GFAP	0	1	2670	Gene_ID	H. sapiens	2670	H. sapiens	GFAP	glial fibrillary acidic protein	GO:0010625 positive regulation of Schwann cell proliferation;GO:0070777 D-aspartate transport;GO:0070779 D-aspartate import across plasma membrane		Predicted intracellular proteins; Human disease related genes:Nervous system diseases:Neurodegenerative diseases; Candidate cardiovascular disease genes; Disease related genes	Intermediate filaments (Supported)				0	0	0	0	1	1	0	0	1	0	1	0	1	0	0	0	0	0	1	0	0
23576	DDAH1	0	1	23576	Gene_ID	H. sapiens	23576	H. sapiens	DDAH1	dimethylarginine dimethylaminohydrolase 1	GO:0000052 citrulline metabolic process;GO:0006527 arginine catabolic process;GO:1900038 negative regulation of cellular response to hypoxia		Enzymes; ENZYME proteins:Hydrolases; Predicted intracellular proteins	Cytosol;Plasma membrane (Approved); Additional: Nucleoli	Citrulline; Pantoprazole; Esomeprazole; Dexlansoprazole		(M5942)HALLMARK UV RESPONSE DN	0	0	0	1	0	0	0	0	0	0	0	0	1	0	0	0	0	0	0	0	0
230	ALDOC	0	1	230	Gene_ID	H. sapiens	230	H. sapiens	ALDOC	aldolase, fructose-bisphosphate C	GO:0030388 fructose 1,6-bisphosphate metabolic process;GO:0006000 fructose metabolic process;GO:0006096 glycolytic process		Candidate cardiovascular disease genes; Cancer-related genes:Candidate cancer biomarkers; ENZYME proteins:Lyases; Enzymes; Predicted intracellular proteins	Nucleoli fibrillar center;Nucleoplasm (Approved); Additional: Cytosol;Vesicles			(M5892)HALLMARK CHOLESTEROL HOMEOSTASIS; (M5891)HALLMARK HYPOXIA	1	1	0	0	0	0	0	0	0	0	0	0	0	0	0	0	0	0	0	0	0
1808	DPYSL2	0	1	1808	Gene_ID	H. sapiens	1808	H. sapiens	DPYSL2	dihydropyrimidinase like 2	GO:0030516 regulation of axon extension;GO:0061387 regulation of extent of cell growth;GO:0008361 regulation of cell size		Predicted intracellular proteins	Cytosol (Supported); Additional: Plasma membrane	Artenimol		(M5919)HALLMARK HEDGEHOG SIGNALING	0	0	0	0	0	1	0	0	1	1	1	0	0	0	0	1	0	0	0	0	0
10963	STIP1	0	1	10963	Gene_ID	H. sapiens	10963	H. sapiens	STIP1	stress induced phosphoprotein 1	GO:0098760 response to interleukin-7;GO:0098761 cellular response to interleukin-7;GO:0071345 cellular response to cytokine stimulus		Predicted intracellular proteins	Nucleoplasm;Plasma membrane (Approved); Additional: Cytosol	Copper		(M5941)HALLMARK UV RESPONSE UP; (M5924)HALLMARK MTORC1 SIGNALING	0	0	0	0	0	0	1	0	0	0	0	0	0	0	0	1	0	0	0	0	0
6854	SYN2	1	0	6854	Gene_ID	H. sapiens	6854	H. sapiens	SYN2	synapsin II	GO:0097091 synaptic vesicle clustering;GO:0097479 synaptic vesicle localization;GO:0017156 calcium-ion regulated exocytosis		Predicted intracellular proteins; Human disease related genes:Other diseases:Mental and behavioural disorders; Disease related genes	Nucleoplasm (Approved)				0	0	1	0	1	0	0	1	0	0	0	0	0	0	0	0	0	0	0	0	0
22948	CCT5	0	1	22948	Gene_ID	H. sapiens	22948	H. sapiens	CCT5	chaperonin containing TCP1 subunit 5	GO:1904851 positive regulation of establishment of protein localization to telomere;GO:0070203 regulation of establishment of protein localization to telomere;GO:1904869 regulation of protein localization to Cajal body		Predicted intracellular proteins; Disease related genes; Human disease related genes:Nervous system diseases:Other nervous and sensory system diseases				(M5926)HALLMARK MYC TARGETS V1	0	0	0	0	0	0	1	0	0	0	0	0	0	0	0	0	0	0	0	0	0
5162	PDHB	0	1	5162	Gene_ID	H. sapiens	5162	H. sapiens	PDHB	pyruvate dehydrogenase E1 subunit beta	GO:0061732 mitochondrial acetyl-CoA biosynthetic process from pyruvate;GO:0006086 acetyl-CoA biosynthetic process from pyruvate;GO:0006085 acetyl-CoA biosynthetic process		ENZYME proteins:Oxidoreductases; Human disease related genes:Congenital disorders of metabolism:Congenital disorders of carbohydrate metabolism; Disease related genes; Potential drug targets; Enzymes; Citric acid cycle related proteins; Predicted intracellular proteins	Mitochondria (Supported); Additional: Nucleoplasm	Pyruvic acid; NADH		(M5935)HALLMARK FATTY ACID METABOLISM; (M5936)HALLMARK OXIDATIVE PHOSPHORYLATION	1	1	0	1	0	0	0	1	0	0	0	0	0	1	0	1	0	0	0	1	0
2617	GARS	0	1	2617	Gene_ID	H. sapiens	2617	H. sapiens	GARS1	glycyl-tRNA synthetase 1	GO:0006426 glycyl-tRNA aminoacylation;GO:0070150 mitochondrial glycyl-tRNA aminoacylation;GO:0015960 diadenosine polyphosphate biosynthetic process		ENZYME proteins:Ligase; Predicted intracellular proteins; Disease related genes; Potential drug targets; Enzymes; Human disease related genes:Nervous system diseases:Neurodegenerative diseases	Cytosol (Supported)	Glycine			1	0	0	1	0	0	0	0	0	0	0	0	0	0	0	0	0	0	0	1	0
2782	GNB1	0	1	2782	Gene_ID	H. sapiens	2782	H. sapiens	GNB1	G protein subunit beta 1	GO:0007191 adenylate cyclase-activating dopamine receptor signaling pathway;GO:0071380 cellular response to prostaglandin E stimulus;GO:0007213 G protein-coupled acetylcholine receptor signaling pathway		Human disease related genes:Other diseases:Mental and behavioural disorders; Cancer-related genes:Mutated cancer genes; Transporters:Accessory Factors Involved in Transport; Disease related genes; Potential drug targets; RAS pathway related proteins; Predicted intracellular proteins	Plasma membrane (Approved); Additional: Golgi apparatus		(M138)PID THROMBIN PAR4 PATHWAY; (M204)PID RHODOPSIN PATHWAY; (M252)PID IL8 CXCR1 PATHWAY		0	0	0	0	1	0	1	1	0	0	0	0	0	0	0	0	0	0	0	0	0
6812	STXBP1	0	1	6812	Gene_ID	H. sapiens	6812	H. sapiens	STXBP1	syntaxin binding protein 1	GO:0106022 positive regulation of vesicle docking;GO:0106020 regulation of vesicle docking;GO:0007412 axon target recognition		Human disease related genes:Nervous system diseases:Epilepsy; Disease related genes; Potential drug targets; Transporters:Transporter channels and pores; Predicted intracellular proteins	Cytosol;Nucleoplasm (Approved)			(M5957)HALLMARK PANCREAS BETA CELLS	0	0	1	0	1	1	1	1	1	0	1	1	1	0	0	0	0	1	1	0	0
11332	ACOT7	0	1	11332	Gene_ID	H. sapiens	11332	H. sapiens	ACOT7	acyl-CoA thioesterase 7	GO:0036116 long-chain fatty-acyl-CoA catabolic process;GO:1900533 palmitic acid metabolic process;GO:1900535 palmitic acid biosynthetic process		Enzymes; ENZYME proteins:Hydrolases; Predicted intracellular proteins	Cytosol (Supported); Additional: Nucleoplasm				1	0	0	1	0	0	0	0	0	0	0	0	0	0	0	0	0	0	0	0	0
6624	FSCN1	0	1	6624	Gene_ID	H. sapiens	6624	H. sapiens	FSCN1	fascin actin-bundling protein 1	GO:0030035 microspike assembly;GO:0032534 regulation of microvillus assembly;GO:0030046 parallel actin filament bundle assembly		Predicted intracellular proteins; Cancer-related genes:Candidate cancer biomarkers	Cytosol (Supported); Additional: Plasma membrane		(M16801)SIG REGULATION OF THE ACTIN CYTOSKELETON BY RHO GTPASES	(M5893)HALLMARK MITOTIC SPINDLE; (M5915)HALLMARK APICAL JUNCTION	0	0	0	0	0	1	1	0	0	0	0	0	1	0	0	0	0	0	0	0	0
8991	SELENBP1	0	1	8991	Gene_ID	H. sapiens	8991	H. sapiens	SELENBP1	selenium binding protein 1	GO:0015031 protein transport;GO:0045184 establishment of protein localization;GO:0071705 nitrogen compound transport		ENZYME proteins:Oxidoreductases; Disease related genes; Potential drug targets; Enzymes; Predicted intracellular proteins; Human disease related genes:Congenital disorders of metabolism:Other congenital disorders of metabolism	Nucleoli (Supported)			(M5891)HALLMARK HYPOXIA; (M5945)HALLMARK HEME METABOLISM	0	0	0	0	0	0	0	0	0	0	0	0	0	0	0	0	0	0	0	0	0
2752	GLUL	0	1	2752	Gene_ID	H. sapiens	2752	H. sapiens	GLUL	glutamate-ammonia ligase	GO:0006542 glutamine biosynthetic process;GO:0019676 ammonia assimilation cycle;GO:0019740 nitrogen utilization		ENZYME proteins:Ligase; Human disease related genes:Congenital disorders of metabolism:Congenital disorders of amino acid metabolism; Disease related genes; Potential drug targets; Enzymes; Predicted intracellular proteins; ENZYME proteins:Transferases	Cytosol;Mitochondria (Supported); Additional: Plasma membrane	L-Glutamine; Glutamic acid		(M5935)HALLMARK FATTY ACID METABOLISM	0	1	0	1	1	0	1	1	0	0	0	0	0	0	0	0	0	0	1	0	0
10574	CCT7	1	0	10574	Gene_ID	H. sapiens	10574	H. sapiens	CCT7	chaperonin containing TCP1 subunit 7	GO:1904851 positive regulation of establishment of protein localization to telomere;GO:0070203 regulation of establishment of protein localization to telomere;GO:1904869 regulation of protein localization to Cajal body		Predicted intracellular proteins	Cytosol (Approved)			(M5926)HALLMARK MYC TARGETS V1	0	0	0	0	0	0	1	0	0	0	0	0	0	0	0	0	0	0	0	0	0
60506	NYX	1	0	60506	Gene_ID	H. sapiens	60506	H. sapiens	NYX	nyctalopin	GO:0007601 visual perception;GO:0050953 sensory perception of light stimulus;GO:0007600 sensory perception		Human disease related genes:Nervous system diseases:Eye disease; Predicted intracellular proteins; Disease related genes			(M5882)NABA PROTEOGLYCANS; (M5884)NABA CORE MATRISOME; (M5889)NABA MATRISOME		0	0	0	0	0	0	0	0	0	0	0	0	0	0	0	0	0	0	0	0	0
22884	WDR37	0	1	22884	Gene_ID	H. sapiens	22884	H. sapiens	WDR37	WD repeat domain 37			Predicted intracellular proteins; Disease related genes	Intermediate filaments (Approved)			(M5942)HALLMARK UV RESPONSE DN	0	0	0	0	0	0	0	0	0	0	0	0	0	0	0	0	0	0	0	0	0
10576	CCT2	0	1	10576	Gene_ID	H. sapiens	10576	H. sapiens	CCT2	chaperonin containing TCP1 subunit 2	GO:0051086 chaperone mediated protein folding independent of cofactor;GO:0090666 scaRNA localization to Cajal body;GO:0090670 RNA localization to Cajal body		Predicted intracellular proteins	Cytosol (Supported)			(M5926)HALLMARK MYC TARGETS V1	0	0	0	0	0	0	1	0	0	0	0	0	0	0	0	0	0	0	0	0	0
2775	GNAO1	0	1	2775	Gene_ID	H. sapiens	2775	H. sapiens	GNAO1	G protein subunit alpha o1	GO:0007212 dopamine receptor signaling pathway;GO:1903351 cellular response to dopamine;GO:1903350 response to dopamine		Human disease related genes:Nervous system diseases:Epilepsy; Predicted intracellular proteins; Disease related genes			(M64)PID S1P S1P4 PATHWAY; (M103)PID S1P S1P1 PATHWAY; (M155)PID S1P META PATHWAY	(M5909)HALLMARK MYOGENESIS	0	0	0	0	0	0	0	1	0	0	0	0	0	0	0	1	0	0	0	0	0
10419	PRMT5	0	1	10419	Gene_ID	H. sapiens	10419	H. sapiens	PRMT5	protein arginine methyltransferase 5	GO:1904990 regulation of adenylate cyclase-inhibiting dopamine receptor signaling pathway;GO:1904992 positive regulation of adenylate cyclase-inhibiting dopamine receptor signaling pathway;GO:0019918 peptidyl-arginine methylation, to symmetrical-dimethyl arginine		Enzymes; Predicted intracellular proteins; ENZYME proteins:Transferases	Cytosol;Nucleoplasm (Supported)		(M261)PID P53 REGULATION PATHWAY; (M101)PID HDAC CLASSI PATHWAY; (M40)PID E2F PATHWAY	(M5901)HALLMARK G2M CHECKPOINT	1	0	0	0	1	0	1	0	0	0	0	1	0	0	0	0	0	1	1	0	0
372	ARCN1	0	1	372	Gene_ID	H. sapiens	372	H. sapiens	ARCN1	archain 1	GO:0021691 cerebellar Purkinje cell layer maturation;GO:0021590 cerebellum maturation;GO:0021699 cerebellar cortex maturation		Human disease related genes:Congenital malformations:Other congenital malformations; Predicted intracellular proteins; Disease related genes	Vesicles (Supported); Additional: Cytosol;Golgi apparatus			(M5910)HALLMARK PROTEIN SECRETION	0	0	0	0	1	0	0	0	0	1	0	0	1	0	0	0	1	0	0	0	0
1759	DNM1	0	1	1759	Gene_ID	H. sapiens	1759	H. sapiens	DNM1	dynamin 1	GO:0016185 synaptic vesicle budding from presynaptic endocytic zone membrane;GO:0070142 synaptic vesicle budding;GO:0048489 synaptic vesicle transport		Human disease related genes:Nervous system diseases:Epilepsy; ENZYME proteins:Hydrolases; Disease related genes; Potential drug targets; Enzymes; Predicted intracellular proteins			(M252)PID IL8 CXCR1 PATHWAY; (M257)PID EPHRINB REV PATHWAY; (M210)PID IL8 CXCR2 PATHWAY		0	0	1	0	1	0	1	1	1	0	0	1	1	0	0	0	1	0	0	0	0
1937	EEF1G	0	1	1937	Gene_ID	H. sapiens	1937	H. sapiens	EEF1G	eukaryotic translation elongation factor 1 gamma	GO:0006414 translational elongation;GO:0006749 glutathione metabolic process;GO:0006575 cellular modified amino acid metabolic process		Predicted intracellular proteins	Cytosol (Approved); Additional: Golgi apparatus				1	0	0	0	0	0	0	0	0	0	0	0	0	0	0	1	0	0	0	1	0
1973	EIF4A1	0	1	1973	Gene_ID	H. sapiens	1973	H. sapiens	EIF4A1	eukaryotic translation initiation factor 4A1	GO:0002183 cytoplasmic translational initiation;GO:0006413 translational initiation;GO:0002181 cytoplasmic translation		Enzymes; ENZYME proteins:Hydrolases; Predicted intracellular proteins	Cytosol (Approved)	Copper	(M121)PID MTOR 4PATHWAY; (M66)PID MYC ACTIV PATHWAY	(M5922)HALLMARK UNFOLDED PROTEIN RESPONSE; (M5926)HALLMARK MYC TARGETS V1	1	0	0	0	0	0	0	0	1	0	0	0	0	0	0	1	0	0	0	1	0
2193	FARSA	1	0	2193	Gene_ID	H. sapiens	2193	H. sapiens	FARSA	phenylalanyl-tRNA synthetase subunit alpha	GO:0006432 phenylalanyl-tRNA aminoacylation;GO:0051290 protein heterotetramerization;GO:0051291 protein heterooligomerization		Enzymes; ENZYME proteins:Ligase; Human disease related genes:Respiratory diseases:Lung diseases; Predicted intracellular proteins	Cytosol (Approved)	Phenylalanine		(M5928)HALLMARK MYC TARGETS V2	1	0	1	1	0	0	0	0	0	0	0	0	0	0	0	0	0	0	0	1	0
3251	HPRT1	0	1	3251	Gene_ID	H. sapiens	3251	H. sapiens	HPRT1	hypoxanthine phosphoribosyltransferase 1	GO:0006178 guanine salvage;GO:0046099 guanine biosynthetic process;GO:0043103 hypoxanthine salvage		FDA approved drug targets:Small molecule drugs; Human disease related genes:Congenital disorders of metabolism:Congenital disorders of nucleotide metabolism; Disease related genes; Enzymes; Predicted intracellular proteins; ENZYME proteins:Transferases	Cytosol (Supported)	Mercaptopurine; 5-O-phosphono-alpha-D-ribofuranosyl diphosphate; 5-monophosphate-9-beta-D-ribofuranosyl xanthine; 3H-pyrazolo[4,3-d]pyrimidin-7-ol; 9-Deazaguanine	(M5493)WNT SIGNALING	(M5898)HALLMARK DNA REPAIR; (M5907)HALLMARK ESTROGEN RESPONSE LATE; (M5924)HALLMARK MTORC1 SIGNALING	1	0	1	1	1	0	0	1	0	1	1	0	1	0	0	0	0	0	0	0	0
197322	ACSF3	1	0	197322	Gene_ID	H. sapiens	197322	H. sapiens	ACSF3	acyl-CoA synthetase family member 3	GO:0090410 malonate catabolic process;GO:0043649 dicarboxylic acid catabolic process;GO:0035338 long-chain fatty-acyl-CoA biosynthetic process		ENZYME proteins:Ligase; Human disease related genes:Congenital disorders of metabolism:Congenital disorders of amino acid metabolism; Disease related genes; Potential drug targets; Enzymes; Predicted intracellular proteins	Mitochondria (Supported); Additional: Nucleoplasm				1	0	0	1	0	0	0	0	0	0	0	0	0	0	0	0	0	0	0	1	0
11151	CORO1A	0	1	11151	Gene_ID	H. sapiens	11151	H. sapiens	CORO1A	coronin 1A	GO:0032796 uropod organization;GO:0061502 early endosome to recycling endosome transport;GO:0031339 negative regulation of vesicle fusion		Human disease related genes:Immune system diseases:Primary immunodeficiency; Predicted intracellular proteins; Disease related genes	Cytosol (Approved)			(M5924)HALLMARK MTORC1 SIGNALING	0	0	0	0	1	1	1	0	0	0	0	0	1	0	0	1	0	1	0	0	0
7345	UCHL1	0	1	7345	Gene_ID	H. sapiens	7345	H. sapiens	UCHL1	ubiquitin C-terminal hydrolase L1	GO:0007412 axon target recognition;GO:0019896 axonal transport of mitochondrion;GO:0034643 establishment of mitochondrion localization, microtubule-mediated		Human disease related genes:Nervous system diseases:Other nervous and sensory system diseases; ENZYME proteins:Hydrolases; Predicted intracellular proteins; Peptidases:Cysteine-type peptidases; Disease related genes; Potential drug targets; Enzymes; Human disease related genes:Nervous system diseases:Neurodegenerative diseases	Cytosol (Supported); Additional: Nucleoplasm	Phenethyl Isothiocyanate	(M275)PID ALPHA SYNUCLEIN PATHWAY		0	0	0	0	1	0	0	1	0	0	1	0	1	0	1	0	0	0	0	0	0
348	APOE	0	1	348	Gene_ID	H. sapiens	348	H. sapiens	APOE	apolipoprotein E	GO:0071831 intermediate-density lipoprotein particle clearance;GO:0150200 regulation of transport across blood-brain barrier;GO:0150201 positive regulation of transport across blood-brain barrier		Candidate cardiovascular disease genes; Cancer-related genes:Candidate cancer biomarkers; Predicted secreted proteins; Human disease related genes:Congenital disorders of metabolism:Congenital disorders of lipid/glycolipid metabolism; Disease related genes; Human disease related genes:Nervous system diseases:Neurodegenerative diseases; Human disease related genes:Congenital disorders of metabolis…	Vesicles (Approved)	Zinc; Copper; Zinc acetate; Zinc chloride; Zinc sulfate, unspecified form		(M5905)HALLMARK ADIPOGENESIS; (M5934)HALLMARK XENOBIOTIC METABOLISM	0	0	1	1	1	1	1	1	1	0	1	1	1	0	0	0	1	1	0	0	0
526	ATP6V1B2	0	1	526	Gene_ID	H. sapiens	526	H. sapiens	ATP6V1B2	ATPase H+ transporting V1 subunit B2	GO:1902600 proton transmembrane transport;GO:0016241 regulation of macroautophagy;GO:0046034 ATP metabolic process		FDA approved drug targets:Small molecule drugs; Human disease related genes:Congenital malformations:Other congenital malformations; Disease related genes; Transporters:Primary Active Transporters; Predicted intracellular proteins	Vesicles (Supported)	Gallium nitrate; 4-(2-Aminoethyl)Benzenesulfonyl Fluoride			0	1	0	0	1	0	0	0	1	0	0	0	1	0	0	1	0	0	0	0	0
2806	GOT2	0	1	2806	Gene_ID	H. sapiens	2806	H. sapiens	GOT2	glutamic-oxaloacetic transaminase 2	GO:0019550 glutamate catabolic process to aspartate;GO:0019551 glutamate catabolic process to 2-oxoglutarate;GO:0006106 fumarate metabolic process		Transporters; Human disease related genes:Nervous system diseases:Epilepsy; Candidate cardiovascular disease genes; Cancer-related genes:Mutational cancer driver genes; Disease related genes; Potential drug targets; Enzymes; Predicted intracellular proteins; ENZYME proteins:Transferases		Pyridoxal phosphate; Aspartic acid; Glutamic acid; Cysteine; 4'-Deoxy-4'-Acetylyamino-Pyridoxal-5'-Phosphate		(M5926)HALLMARK MYC TARGETS V1; (M5936)HALLMARK OXIDATIVE PHOSPHORYLATION; (M5937)HALLMARK GLYCOLYSIS	0	1	0	1	0	0	0	0	0	0	0	0	0	0	0	0	0	0	0	0	0
29767	TMOD2	0	1	29767	Gene_ID	H. sapiens	29767	H. sapiens	TMOD2	tropomodulin 2	GO:0007270 neuron-neuron synaptic transmission;GO:0051694 pointed-end actin filament capping;GO:0045745 positive regulation of G protein-coupled receptor signaling pathway		Predicted intracellular proteins	Nucleoli fibrillar center (Approved); Additional: Nucleoplasm				0	0	0	0	1	1	0	0	0	0	1	0	1	0	0	0	0	1	0	0	0
51493	RTCB	1	0	51493	Gene_ID	H. sapiens	51493	H. sapiens	RTCB	RNA 2',3'-cyclic phosphate and 5'-OH ligase	GO:0000378 RNA exon ligation;GO:0000968 tRNA exon ligation;GO:0000971 tRNA exon ligation utilizing 2',3' cyclic phosphate of 5'-exon as source of linkage phosphate		Enzymes; ENZYME proteins:Ligase; Predicted intracellular proteins	Nucleoplasm (Supported); Additional: Cytosol;Vesicles	Sucrose			0	0	0	0	0	0	0	0	0	0	0	0	0	0	0	0	0	0	0	0	0
1974	EIF4A2	0	1	1974	Gene_ID	H. sapiens	1974	H. sapiens	EIF4A2	eukaryotic translation initiation factor 4A2	GO:1900259 regulation of RNA-directed 5'-3' RNA polymerase activity;GO:1900260 negative regulation of RNA-directed 5'-3' RNA polymerase activity;GO:0002183 cytoplasmic translational initiation		Enzymes; ENZYME proteins:Hydrolases; Predicted intracellular proteins; Cancer-related genes:Mutational cancer driver genes	Cytosol (Approved)			(M5922)HALLMARK UNFOLDED PROTEIN RESPONSE; (M5909)HALLMARK MYOGENESIS	1	0	0	0	0	0	0	0	0	0	0	0	1	0	0	0	0	0	0	1	0
3945	LDHB	0	1	3945	Gene_ID	H. sapiens	3945	H. sapiens	LDHB	lactate dehydrogenase B	GO:0006089 lactate metabolic process;GO:0006090 pyruvate metabolic process;GO:0005975 carbohydrate metabolic process		FDA approved drug targets:Small molecule drugs; ENZYME proteins:Oxidoreductases; Disease related genes; Enzymes; Predicted intracellular proteins	Cytosol (Supported)	NADH; 4-Hydroxy-1,2,5-oxadiazole-3-carboxylic acid; Oxamic Acid; Stiripentol; Artenimol		(M5936)HALLMARK OXIDATIVE PHOSPHORYLATION; (M5939)HALLMARK P53 PATHWAY	1	1	1	1	0	0	0	0	0	0	0	0	0	1	0	0	0	0	0	0	0
10808	HSPH1	0	1	10808	Gene_ID	H. sapiens	10808	H. sapiens	HSPH1	heat shock protein family H (Hsp110) member 1	GO:0045345 positive regulation of MHC class I biosynthetic process;GO:0045343 regulation of MHC class I biosynthetic process;GO:0051135 positive regulation of NK T cell activation		Predicted intracellular proteins; Cancer-related genes:Candidate cancer biomarkers	Cytosol (Enhanced); Additional: Nucleoplasm	Phenethyl Isothiocyanate		(M5935)HALLMARK FATTY ACID METABOLISM	0	0	0	0	0	0	1	0	0	0	0	0	0	0	0	1	1	0	0	0	0
5464	PPA1	0	1	5464	Gene_ID	H. sapiens	5464	H. sapiens	PPA1	inorganic pyrophosphatase 1	GO:0006796 phosphate-containing compound metabolic process;GO:0006793 phosphorus metabolic process;GO:0044237 cellular metabolic process		Enzymes; ENZYME proteins:Hydrolases; Predicted intracellular proteins	Vesicles (Supported)			(M5924)HALLMARK MTORC1 SIGNALING	0	0	0	0	0	0	0	0	0	0	0	0	0	0	0	0	0	0	0	1	0
11315	PARK7	0	1	11315	Gene_ID	H. sapiens	11315	H. sapiens	PARK7	Parkinsonism associated deglycase	GO:0036471 cellular response to glyoxal;GO:0036526 peptidyl-cysteine deglycation;GO:0036527 peptidyl-arginine deglycation		ENZYME proteins:Hydrolases; Predicted intracellular proteins; Peptidases:Cysteine-type peptidases; Disease related genes; Potential drug targets; Enzymes; Human disease related genes:Nervous system diseases:Neurodegenerative diseases	Cytosol;Nucleoplasm (Supported)	Copper	(M275)PID ALPHA SYNUCLEIN PATHWAY		1	0	1	1	1	1	1	0	0	0	0	0	1	0	1	0	0	1	0	1	0
5413	SEPT5	0	1	5413	Gene_ID	H. sapiens	5413	H. sapiens	SEPTIN5	septin 5	GO:0016080 synaptic vesicle targeting;GO:0006903 vesicle targeting;GO:0035176 social behavior		Predicted intracellular proteins	Actin filaments;Cytosol;Nucleoplasm (Approved)				0	0	1	0	1	0	0	0	0	0	0	0	1	0	1	0	0	0	0	0	0
4155	MBP	1	0	4155	Gene_ID	H. sapiens	4155	H. sapiens	MBP	myelin basic protein	GO:1904685 positive regulation of metalloendopeptidase activity;GO:2000343 positive regulation of chemokine (C-X-C motif) ligand 2 production;GO:0046689 response to mercury ion		Predicted intracellular proteins; Candidate cardiovascular disease genes; Disease related genes	Plasma membrane (Approved)			(M5938)HALLMARK REACTIVE OXYGEN SPECIES PATHWAY	0	0	0	0	1	1	0	0	1	1	0	1	1	0	0	0	0	0	0	0	0
2665	GDI2	0	1	2665	Gene_ID	H. sapiens	2665	H. sapiens	GDI2	GDP dissociation inhibitor 2	GO:1903565 negative regulation of protein localization to cilium;GO:1903564 regulation of protein localization to cilium;GO:1902018 negative regulation of cilium assembly		Predicted intracellular proteins	Cytosol (Approved)		(M16801)SIG REGULATION OF THE ACTIN CYTOSKELETON BY RHO GTPASES; (M5193)SIG CHEMOTAXIS		0	0	0	0	0	1	1	0	0	0	0	0	1	0	0	0	1	0	0	0	0
47	ACLY	1	0	47	Gene_ID	H. sapiens	47	H. sapiens	ACLY	ATP citrate lyase	GO:0006101 citrate metabolic process;GO:0006107 oxaloacetate metabolic process;GO:0006085 acetyl-CoA biosynthetic process		FDA approved drug targets:Small molecule drugs; Cancer-related genes:Candidate cancer biomarkers; Enzymes; Citric acid cycle related proteins; Predicted intracellular proteins; ENZYME proteins:Transferases	Cytosol (Supported); Additional: Nucleoplasm	Bempedoic acid		(M5905)HALLMARK ADIPOGENESIS; (M5924)HALLMARK MTORC1 SIGNALING	1	1	1	1	0	0	0	1	0	0	0	0	0	1	0	0	0	0	0	1	0

## Sheet: Enrichment
GroupID	Category	Term	Description	LogP	Log(q-value)	InTerm_InList	Genes	Symbols
1_Summary	GO Biological Processes	GO:0055086	nucleobase-containing small molecule metabolic process	-12.1508	-7.93273	15/483	47,230,2023,2617,3098,3251,4976,5162,5594,7415,8803,11315,11332,55753,197322,7086,3945,6622,56922,1937,1973,1974,2193,10419	ACLY,ALDOC,ENO1,GARS1,HK1,HPRT1,OPA1,PDHB,MAPK1,VCP,SUCLA2,PARK7,ACOT7,OGDHL,ACSF3,TKT,LDHB,SNCA,MCCC1,EEF1G,EIF4A1,EIF4A2,FARSA,PRMT5
1_Member	GO Biological Processes	GO:0055086	nucleobase-containing small molecule metabolic process	-12.1508	-7.93273	15/483	47,230,2023,2617,3098,3251,4976,5162,5594,7415,8803,11315,11332,55753,197322	ACLY,ALDOC,ENO1,GARS1,HK1,HPRT1,OPA1,PDHB,MAPK1,VCP,SUCLA2,PARK7,ACOT7,OGDHL,ACSF3
1_Member	GO Biological Processes	GO:0009117	nucleotide metabolic process	-11.9298	-7.93273	14/408	47,230,2023,2617,3098,3251,4976,5162,7415,8803,11315,11332,55753,197322	ACLY,ALDOC,ENO1,GARS1,HK1,HPRT1,OPA1,PDHB,VCP,SUCLA2,PARK7,ACOT7,OGDHL,ACSF3
1_Member	GO Biological Processes	GO:0006753	nucleoside phosphate metabolic process	-11.8023	-7.93273	14/417	47,230,2023,2617,3098,3251,4976,5162,7415,8803,11315,11332,55753,197322	ACLY,ALDOC,ENO1,GARS1,HK1,HPRT1,OPA1,PDHB,VCP,SUCLA2,PARK7,ACOT7,OGDHL,ACSF3
1_Member	GO Biological Processes	GO:0019693	ribose phosphate metabolic process	-10.5482	-7.04662	12/330	47,230,2023,3098,3251,4976,5162,7086,8803,11332,55753,197322	ACLY,ALDOC,ENO1,HK1,HPRT1,OPA1,PDHB,TKT,SUCLA2,ACOT7,OGDHL,ACSF3
1_Member	GO Biological Processes	GO:0009150	purine ribonucleotide metabolic process	-9.70231	-6.30987	11/302	47,230,2023,3098,3251,4976,5162,8803,11332,55753,197322	ACLY,ALDOC,ENO1,HK1,HPRT1,OPA1,PDHB,SUCLA2,ACOT7,OGDHL,ACSF3
1_Member	GO Biological Processes	GO:0006163	purine nucleotide metabolic process	-9.50849	-6.1618	11/315	47,230,2023,3098,3251,4976,5162,8803,11332,55753,197322	ACLY,ALDOC,ENO1,HK1,HPRT1,OPA1,PDHB,SUCLA2,ACOT7,OGDHL,ACSF3
1_Member	GO Biological Processes	GO:0009259	ribonucleotide metabolic process	-9.43622	-6.13093	11/320	47,230,2023,3098,3251,4976,5162,8803,11332,55753,197322	ACLY,ALDOC,ENO1,HK1,HPRT1,OPA1,PDHB,SUCLA2,ACOT7,OGDHL,ACSF3
1_Member	GO Biological Processes	GO:0072521	purine-containing compound metabolic process	-9.21288	-5.94537	11/336	47,230,2023,3098,3251,4976,5162,8803,11332,55753,197322	ACLY,ALDOC,ENO1,HK1,HPRT1,OPA1,PDHB,SUCLA2,ACOT7,OGDHL,ACSF3
1_Member	GO Biological Processes	GO:0032787	monocarboxylic acid metabolic process	-8.58198	-5.4234	12/491	47,230,2023,3098,3945,5162,6622,11315,11332,55753,56922,197322	ACLY,ALDOC,ENO1,HK1,LDHB,PDHB,SNCA,PARK7,ACOT7,OGDHL,MCCC1,ACSF3
1_Member	GO Biological Processes	GO:0043603	cellular amide metabolic process	-6.56957	-3.88564	12/750	47,1937,1973,1974,2193,2617,5162,8803,11315,11332,56922,197322	ACLY,EEF1G,EIF4A1,EIF4A2,FARSA,GARS1,PDHB,SUCLA2,PARK7,ACOT7,MCCC1,ACSF3
1_Member	GO Biological Processes	GO:0006790	sulfur compound metabolic process	-5.81409	-3.33073	8/331	47,1937,5162,8803,11315,11332,56922,197322	ACLY,EEF1G,PDHB,SUCLA2,PARK7,ACOT7,MCCC1,ACSF3
1_Member	GO Biological Processes	GO:0006637	acyl-CoA metabolic process	-5.59003	-3.18286	5/88	47,5162,8803,11332,197322	ACLY,PDHB,SUCLA2,ACOT7,ACSF3
1_Member	GO Biological Processes	GO:0035383	thioester metabolic process	-5.59003	-3.18286	5/88	47,5162,8803,11332,197322	ACLY,PDHB,SUCLA2,ACOT7,ACSF3
1_Member	GO Biological Processes	GO:0046390	ribose phosphate biosynthetic process	-5.48129	-3.10308	6/165	47,3251,5162,7086,11332,197322	ACLY,HPRT1,PDHB,TKT,ACOT7,ACSF3
1_Member	GO Biological Processes	GO:0033865	nucleoside bisphosphate metabolic process	-4.92938	-2.68259	5/120	47,5162,8803,11332,197322	ACLY,PDHB,SUCLA2,ACOT7,ACSF3
1_Member	GO Biological Processes	GO:0033875	ribonucleoside bisphosphate metabolic process	-4.92938	-2.68259	5/120	47,5162,8803,11332,197322	ACLY,PDHB,SUCLA2,ACOT7,ACSF3
1_Member	GO Biological Processes	GO:0034032	purine nucleoside bisphosphate metabolic process	-4.92938	-2.68259	5/120	47,5162,8803,11332,197322	ACLY,PDHB,SUCLA2,ACOT7,ACSF3
1_Member	GO Biological Processes	GO:0009165	nucleotide biosynthetic process	-4.83549	-2.61266	6/214	47,2617,3251,5162,11332,197322	ACLY,GARS1,HPRT1,PDHB,ACOT7,ACSF3
1_Member	GO Biological Processes	GO:1901293	nucleoside phosphate biosynthetic process	-4.81264	-2.60094	6/216	47,2617,3251,5162,11332,197322	ACLY,GARS1,HPRT1,PDHB,ACOT7,ACSF3
1_Member	GO Biological Processes	GO:0019438	aromatic compound biosynthetic process	-4.60781	-2.45162	10/799	47,2617,3251,5162,6622,7415,8803,10419,11332,197322	ACLY,GARS1,HPRT1,PDHB,SNCA,VCP,SUCLA2,PRMT5,ACOT7,ACSF3
1_Member	GO Biological Processes	GO:0009152	purine ribonucleotide biosynthetic process	-4.54709	-2.41663	5/144	47,3251,5162,11332,197322	ACLY,HPRT1,PDHB,ACOT7,ACSF3
1_Member	GO Biological Processes	GO:0006164	purine nucleotide biosynthetic process	-4.43466	-2.31842	5/152	47,3251,5162,11332,197322	ACLY,HPRT1,PDHB,ACOT7,ACSF3
1_Member	GO Biological Processes	GO:0009260	ribonucleotide biosynthetic process	-4.35443	-2.2606	5/158	47,3251,5162,11332,197322	ACLY,HPRT1,PDHB,ACOT7,ACSF3
1_Member	GO Biological Processes	GO:0072522	purine-containing compound biosynthetic process	-4.31554	-2.22653	5/161	47,3251,5162,11332,197322	ACLY,HPRT1,PDHB,ACOT7,ACSF3
1_Member	GO Biological Processes	GO:0018130	heterocycle biosynthetic process	-3.87852	-1.86225	9/790	47,2617,3251,5162,7415,8803,10419,11332,197322	ACLY,GARS1,HPRT1,PDHB,VCP,SUCLA2,PRMT5,ACOT7,ACSF3
1_Member	GO Biological Processes	GO:0090407	organophosphate biosynthetic process	-3.71101	-1.72427	7/488	47,2617,3251,5162,7086,11332,197322	ACLY,GARS1,HPRT1,PDHB,TKT,ACOT7,ACSF3
1_Member	GO Biological Processes	GO:0034654	nucleobase-containing compound biosynthetic process	-3.43091	-1.49585	8/718	47,2617,3251,5162,7415,10419,11332,197322	ACLY,GARS1,HPRT1,PDHB,VCP,PRMT5,ACOT7,ACSF3
1_Member	GO Biological Processes	GO:0006631	fatty acid metabolic process	-2.72998	-0.986437	3/325	47,6622,197322	ACLY,SNCA,ACSF3
2_Summary	KEGG Pathway	hsa01200	Carbon metabolism	-11.4864	-7.13967	9/115	230,2023,2746,2806,3098,5162,7086,8803,55753,3945,815,5594,526,6622,7415,2752,47,27294	ALDOC,ENO1,GLUD1,GOT2,HK1,PDHB,TKT,SUCLA2,OGDHL,LDHB,CAMK2A,MAPK1,ATP6V1B2,SNCA,VCP,GLUL,ACLY,DHDH
2_Member	KEGG Pathway	hsa01200	Carbon metabolism	-11.4864	-7.13967	9/115	230,2023,2746,2806,3098,5162,7086,8803,55753	ALDOC,ENO1,GLUD1,GOT2,HK1,PDHB,TKT,SUCLA2,OGDHL
2_Member	GO Biological Processes	GO:0006090	pyruvate metabolic process	-8.44624	-5.14852	6/60	230,2023,3098,3945,5162,55753	ALDOC,ENO1,HK1,LDHB,PDHB,OGDHL
2_Member	KEGG Pathway	hsa04066	HIF-1 signaling pathway	-8.41603	-5.14852	7/109	230,815,2023,3098,3945,5162,5594	ALDOC,CAMK2A,ENO1,HK1,LDHB,PDHB,MAPK1
2_Member	WikiPathways	WP534	Glycolysis and gluconeogenesis	-7.34631	-4.37984	5/45	230,2023,2806,3098,3945	ALDOC,ENO1,GOT2,HK1,LDHB
2_Member	GO Biological Processes	GO:0046034	ATP metabolic process	-6.67251	-3.92789	7/195	230,526,2023,3098,6622,7415,55753	ALDOC,ATP6V1B2,ENO1,HK1,SNCA,VCP,OGDHL
2_Member	KEGG Pathway	hsa00010	Glycolysis / Gluconeogenesis	-6.46424	-3.761	5/67	230,2023,3098,3945,5162	ALDOC,ENO1,HK1,LDHB,PDHB
2_Member	KEGG Pathway	hsa01230	Biosynthesis of amino acids	-6.21783	-3.54324	5/75	230,2023,2752,2806,7086	ALDOC,ENO1,GLUL,GOT2,TKT
2_Member	GO Biological Processes	GO:0006096	glycolytic process	-5.81917	-3.25151	4/39	230,2023,3098,55753	ALDOC,ENO1,HK1,OGDHL
2_Member	WikiPathways	WP5049	Glycolysis in senescence	-5.80989	-3.25151	3/11	230,2023,3098	ALDOC,ENO1,HK1
2_Member	GO Biological Processes	GO:0006757	ATP generation from ADP	-5.77411	-3.24697	4/40	230,2023,3098,55753	ALDOC,ENO1,HK1,OGDHL
2_Member	GO Biological Processes	GO:0006091	generation of precursor metabolites and energy	-5.73623	-3.22206	8/388	230,2023,3098,5162,6622,7086,8803,55753	ALDOC,ENO1,HK1,PDHB,SNCA,TKT,SUCLA2,OGDHL
2_Member	WikiPathways	WP4018	Clear cell renal cell carcinoma pathways	-5.61461	-3.18286	5/87	47,230,2023,3098,3945	ACLY,ALDOC,ENO1,HK1,LDHB
2_Member	GO Biological Processes	GO:0016052	carbohydrate catabolic process	-5.55365	-3.11545	5/102	230,2023,3098,27294,55753	ALDOC,ENO1,HK1,DHDH,OGDHL
2_Member	GO Biological Processes	GO:0046031	ADP metabolic process	-5.45152	-3.03933	4/48	230,2023,3098,55753	ALDOC,ENO1,HK1,OGDHL
2_Member	GO Biological Processes	GO:0006165	nucleoside diphosphate phosphorylation	-5.15032	-2.83706	4/57	230,2023,3098,55753	ALDOC,ENO1,HK1,OGDHL
2_Member	GO Biological Processes	GO:0046939	nucleotide phosphorylation	-5.11998	-2.82252	4/58	230,2023,3098,55753	ALDOC,ENO1,HK1,OGDHL
2_Member	GO Biological Processes	GO:0009135	purine nucleoside diphosphate metabolic process	-5.03218	-2.7754	4/61	230,2023,3098,55753	ALDOC,ENO1,HK1,OGDHL
2_Member	GO Biological Processes	GO:0009179	purine ribonucleoside diphosphate metabolic process	-5.03218	-2.7754	4/61	230,2023,3098,55753	ALDOC,ENO1,HK1,OGDHL
2_Member	GO Biological Processes	GO:0009185	ribonucleoside diphosphate metabolic process	-4.79371	-2.59315	4/70	230,2023,3098,55753	ALDOC,ENO1,HK1,OGDHL
2_Member	GO Biological Processes	GO:0006734	NADH metabolic process	-4.675	-2.5044	3/25	2023,3098,7415	ENO1,HK1,VCP
2_Member	GO Biological Processes	GO:0005996	monosaccharide metabolic process	-4.56316	-2.42866	5/163	230,2023,3098,5162,27294	ALDOC,ENO1,HK1,PDHB,DHDH
2_Member	GO Biological Processes	GO:0009132	nucleoside diphosphate metabolic process	-4.38165	-2.29742	4/89	230,2023,3098,55753	ALDOC,ENO1,HK1,OGDHL
2_Member	Reactome Gene Sets	R-HSA-70326	Glucose metabolism	-4.34379	-2.27356	4/91	230,2023,2806,3098	ALDOC,ENO1,GOT2,HK1
2_Member	Reactome Gene Sets	R-HSA-70263	Gluconeogenesis	-4.26574	-2.21131	3/34	230,2023,2806	ALDOC,ENO1,GOT2
2_Member	GO Biological Processes	GO:0005975	carbohydrate metabolic process	-4.21785	-2.17219	7/462	230,2023,3098,3945,5162,27294,55753	ALDOC,ENO1,HK1,LDHB,PDHB,DHDH,OGDHL
2_Member	GO Biological Processes	GO:0046365	monosaccharide catabolic process	-4.19037	-2.14937	3/36	2023,3098,27294	ENO1,HK1,DHDH
2_Member	GO Biological Processes	GO:0019318	hexose metabolic process	-3.60765	-1.6891	4/141	230,2023,3098,5162	ALDOC,ENO1,HK1,PDHB
2_Member	Reactome Gene Sets	R-HSA-71387	Metabolism of carbohydrates	-3.35741	-1.49062	5/295	230,2023,2806,3098,7086	ALDOC,ENO1,GOT2,HK1,TKT
2_Member	Reactome Gene Sets	R-HSA-70171	Glycolysis	-3.31034	-1.4592	3/71	230,2023,3098	ALDOC,ENO1,HK1
2_Member	GO Biological Processes	GO:0006006	glucose metabolic process	-2.89053	-1.1257	3/99	2023,3098,5162	ENO1,HK1,PDHB
3_Summary	GO Biological Processes	GO:0099504	synaptic vesicle cycle	-10.9945	-7.31225	9/114	60,1759,5413,5864,6456,6620,6622,6812,6854,47,348,1428,3251,3945,11315,2193,4976,30844	ACTB,DNM1,SEPTIN5,RAB3A,SH3GL2,SNCB,SNCA,STXBP1,SYN2,ACLY,APOE,CRYM,HPRT1,LDHB,PARK7,FARSA,OPA1,EHD4
3_Member	GO Biological Processes	GO:0099504	synaptic vesicle cycle	-10.9945	-7.31225	9/114	60,1759,5413,5864,6456,6620,6622,6812,6854	ACTB,DNM1,SEPTIN5,RAB3A,SH3GL2,SNCB,SNCA,STXBP1,SYN2
3_Member	GO Biological Processes	GO:0099003	vesicle-mediated transport in synapse	-10.7919	-7.22334	9/120	60,1759,5413,5864,6456,6620,6622,6812,6854	ACTB,DNM1,SEPTIN5,RAB3A,SH3GL2,SNCB,SNCA,STXBP1,SYN2
3_Member	GO Biological Processes	GO:0036465	synaptic vesicle recycling	-8.58381	-5.23713	6/57	60,1759,5864,6456,6620,6622	ACTB,DNM1,RAB3A,SH3GL2,SNCB,SNCA
3_Member	GO Biological Processes	GO:0048488	synaptic vesicle endocytosis	-7.15585	-4.25632	5/49	60,1759,6456,6620,6622	ACTB,DNM1,SH3GL2,SNCB,SNCA
3_Member	GO Biological Processes	GO:0140238	presynaptic endocytosis	-7.15585	-4.25632	5/49	60,1759,6456,6620,6622	ACTB,DNM1,SH3GL2,SNCB,SNCA
3_Member	GO Biological Processes	GO:1901615	organic hydroxy compound metabolic process	-4.72233	-2.53701	8/467	47,348,1428,3251,3945,6620,6622,11315	ACLY,APOE,CRYM,HPRT1,LDHB,SNCB,SNCA,PARK7
3_Member	GO Biological Processes	GO:0042417	dopamine metabolic process	-4.43154	-2.32789	3/30	3251,6620,6622	HPRT1,SNCB,SNCA
3_Member	GO Biological Processes	GO:0018958	phenol-containing compound metabolic process	-4.38165	-2.29742	4/89	1428,3251,6620,6622	CRYM,HPRT1,SNCB,SNCA
3_Member	GO Biological Processes	GO:0050808	synapse organization	-4.23058	-2.18275	4/284	60,5864,6620,6622	ACTB,RAB3A,SNCB,SNCA
3_Member	GO Biological Processes	GO:0006584	catecholamine metabolic process	-3.86947	-1.90118	3/46	3251,6620,6622	HPRT1,SNCB,SNCA
3_Member	GO Biological Processes	GO:0009712	catechol-containing compound metabolic process	-3.86947	-1.90118	3/46	3251,6620,6622	HPRT1,SNCB,SNCA
3_Member	GO Biological Processes	GO:0051259	protein complex oligomerization	-3.49631	-1.55102	5/241	2193,3251,4976,6622,30844	FARSA,HPRT1,OPA1,SNCA,EHD4
3_Member	GO Biological Processes	GO:0034330	cell junction organization	-3.38213	-1.5082	4/473	60,5864,6620,6622	ACTB,RAB3A,SNCB,SNCA
3_Member	GO Biological Processes	GO:0006576	cellular biogenic amine metabolic process	-2.98244	-1.19446	3/92	3251,6620,6622	HPRT1,SNCB,SNCA
3_Member	GO Biological Processes	GO:0044106	cellular amine metabolic process	-2.98244	-1.19446	3/92	3251,6620,6622	HPRT1,SNCB,SNCA
3_Member	GO Biological Processes	GO:0009308	amine metabolic process	-2.91606	-1.14572	3/97	3251,6620,6622	HPRT1,SNCB,SNCA
4_Summary	GO Biological Processes	GO:0044282	small molecule catabolic process	-10.1962	-6.75261	12/354	348,1428,2023,2746,2752,2806,3098,11315,23576,27294,56922,197322,47,5162,7086,8803,55753,11332,2193,2617,3251,3945,815	APOE,CRYM,ENO1,GLUD1,GLUL,GOT2,HK1,PARK7,DDAH1,DHDH,MCCC1,ACSF3,ACLY,PDHB,TKT,SUCLA2,OGDHL,ACOT7,FARSA,GARS1,HPRT1,LDHB,CAMK2A
4_Member	GO Biological Processes	GO:0044282	small molecule catabolic process	-10.1962	-6.75261	12/354	348,1428,2023,2746,2752,2806,3098,11315,23576,27294,56922,197322	APOE,CRYM,ENO1,GLUD1,GLUL,GOT2,HK1,PARK7,DDAH1,DHDH,MCCC1,ACSF3
4_Member	WikiPathways	WP4290	Metabolic reprogramming in colon cancer	-8.93881	-5.73825	6/44	47,2023,2746,2806,5162,7086	ACLY,ENO1,GLUD1,GOT2,PDHB,TKT
4_Member	GO Biological Processes	GO:0043648	dicarboxylic acid metabolic process	-8.56596	-5.4234	7/91	47,2746,2752,2806,8803,55753,197322	ACLY,GLUD1,GLUL,GOT2,SUCLA2,OGDHL,ACSF3
4_Member	GO Biological Processes	GO:1901606	alpha-amino acid catabolic process	-7.31591	-4.36716	6/92	1428,2746,2752,2806,23576,56922	CRYM,GLUD1,GLUL,GOT2,DDAH1,MCCC1
4_Member	GO Biological Processes	GO:0043649	dicarboxylic acid catabolic process	-7.00499	-4.21272	4/18	2746,2752,2806,197322	GLUD1,GLUL,GOT2,ACSF3
4_Member	GO Biological Processes	GO:0009063	cellular amino acid catabolic process	-6.85134	-4.07285	6/110	1428,2746,2752,2806,23576,56922	CRYM,GLUD1,GLUL,GOT2,DDAH1,MCCC1
4_Member	GO Biological Processes	GO:0009065	glutamine family amino acid catabolic process	-6.6224	-3.89896	4/25	2746,2752,2806,23576	GLUD1,GLUL,GOT2,DDAH1
4_Member	GO Biological Processes	GO:0046394	carboxylic acid biosynthetic process	-6.60311	-3.89988	8/260	47,2746,2752,2806,8803,11315,11332,197322	ACLY,GLUD1,GLUL,GOT2,SUCLA2,PARK7,ACOT7,ACSF3
4_Member	GO Biological Processes	GO:0016053	organic acid biosynthetic process	-6.57782	-3.88564	8/262	47,2746,2752,2806,8803,11315,11332,197322	ACLY,GLUD1,GLUL,GOT2,SUCLA2,PARK7,ACOT7,ACSF3
4_Member	GO Biological Processes	GO:0006520	cellular amino acid metabolic process	-6.40639	-3.7499	8/276	1428,2193,2617,2746,2752,2806,23576,56922	CRYM,FARSA,GARS1,GLUD1,GLUL,GOT2,DDAH1,MCCC1
4_Member	GO Biological Processes	GO:0006538	glutamate catabolic process	-6.27717	-3.59325	3/8	2746,2752,2806	GLUD1,GLUL,GOT2
4_Member	GO Biological Processes	GO:0044283	small molecule biosynthetic process	-6.02694	-3.47265	9/423	47,2746,2752,2806,3251,8803,11315,11332,197322	ACLY,GLUD1,GLUL,GOT2,HPRT1,SUCLA2,PARK7,ACOT7,ACSF3
4_Member	GO Biological Processes	GO:0046395	carboxylic acid catabolic process	-5.93027	-3.40313	7/220	1428,2746,2752,2806,23576,56922,197322	CRYM,GLUD1,GLUL,GOT2,DDAH1,MCCC1,ACSF3
4_Member	GO Biological Processes	GO:0016054	organic acid catabolic process	-5.87811	-3.36393	7/224	1428,2746,2752,2806,23576,56922,197322	CRYM,GLUD1,GLUL,GOT2,DDAH1,MCCC1,ACSF3
4_Member	WikiPathways	WP3925	Amino acid metabolism	-5.51803	-3.13038	5/91	47,2746,2752,2806,56922	ACLY,GLUD1,GLUL,GOT2,MCCC1
4_Member	Reactome Gene Sets	R-HSA-8964539	Glutamate and glutamine metabolism	-5.46827	-3.04587	3/14	2746,2752,2806	GLUD1,GLUL,GOT2
4_Member	GO Biological Processes	GO:1901605	alpha-amino acid metabolic process	-5.39477	-2.99257	6/195	1428,2746,2752,2806,23576,56922	CRYM,GLUD1,GLUL,GOT2,DDAH1,MCCC1
4_Member	KEGG Pathway	hsa00220	Arginine biosynthesis	-4.8472	-2.62762	3/22	2746,2752,2806	GLUD1,GLUL,GOT2
4_Member	GO Biological Processes	GO:0009064	glutamine family amino acid metabolic process	-4.76923	-2.57483	4/71	2746,2752,2806,23576	GLUD1,GLUL,GOT2,DDAH1
4_Member	WikiPathways	WP4595	Urea cycle and associated pathways	-4.72985	-2.54751	3/24	2746,2806,3945	GLUD1,GOT2,LDHB
4_Member	GO Biological Processes	GO:0006536	glutamate metabolic process	-4.388	-2.299	3/31	2746,2752,2806	GLUD1,GLUL,GOT2
4_Member	KEGG Pathway	hsa00250	Alanine, aspartate and glutamate metabolism	-4.15432	-2.11938	3/37	2746,2752,2806	GLUD1,GLUL,GOT2
4_Member	Reactome Gene Sets	R-HSA-71291	Metabolism of amino acids and derivatives	-3.8115	-1.85751	6/374	1428,2746,2752,2806,5162,56922	CRYM,GLUD1,GLUL,GOT2,PDHB,MCCC1
4_Member	GO Biological Processes	GO:1901607	alpha-amino acid biosynthetic process	-3.38435	-1.50871	3/67	2746,2752,2806	GLUD1,GLUL,GOT2
4_Member	GO Biological Processes	GO:0008652	cellular amino acid biosynthetic process	-3.29252	-1.44552	3/72	2746,2752,2806	GLUD1,GLUL,GOT2
4_Member	KEGG Pathway	hsa04217	Necroptosis	-2.30795	-0.639301	3/159	815,2746,2752	CAMK2A,GLUD1,GLUL
5_Summary	GO Biological Processes	GO:0099536	synaptic signaling	-9.09576	-5.86302	12/442	348,2782,4155,5413,5594,5864,6620,6622,6812,6854,11315,29767,1759,4905,815,2670,2752,11151,526,30844,372,4976,7345,2746,23603,60,3251,10419	APOE,GNB1,MBP,SEPTIN5,MAPK1,RAB3A,SNCB,SNCA,STXBP1,SYN2,PARK7,TMOD2,DNM1,NSF,CAMK2A,GFAP,GLUL,CORO1A,ATP6V1B2,EHD4,ARCN1,OPA1,UCHL1,GLUD1,CORO1C,ACTB,HPRT1,PRMT5
5_Member	GO Biological Processes	GO:0099536	synaptic signaling	-9.09576	-5.86302	12/442	348,2782,4155,5413,5594,5864,6620,6622,6812,6854,11315,29767	APOE,GNB1,MBP,SEPTIN5,MAPK1,RAB3A,SNCB,SNCA,STXBP1,SYN2,PARK7,TMOD2
5_Member	WikiPathways	WP2267	Synaptic vesicle pathway	-8.48551	-5.39921	6/52	1759,4905,5864,6812,6854,11315	DNM1,NSF,RAB3A,STXBP1,SYN2,PARK7
5_Member	GO Biological Processes	GO:0007268	chemical synaptic transmission	-8.46715	-5.39921	11/396	348,4155,5413,5594,5864,6620,6622,6812,6854,11315,29767	APOE,MBP,SEPTIN5,MAPK1,RAB3A,SNCB,SNCA,STXBP1,SYN2,PARK7,TMOD2
5_Member	GO Biological Processes	GO:0098916	anterograde trans-synaptic signaling	-8.46715	-5.39921	11/396	348,4155,5413,5594,5864,6620,6622,6812,6854,11315,29767	APOE,MBP,SEPTIN5,MAPK1,RAB3A,SNCB,SNCA,STXBP1,SYN2,PARK7,TMOD2
5_Member	GO Biological Processes	GO:0099537	trans-synaptic signaling	-8.27804	-5.25357	11/413	348,4155,5413,5594,5864,6620,6622,6812,6854,11315,29767	APOE,MBP,SEPTIN5,MAPK1,RAB3A,SNCB,SNCA,STXBP1,SYN2,PARK7,TMOD2
5_Member	GO Biological Processes	GO:0050804	modulation of chemical synaptic transmission	-7.58148	-4.49363	10/428	348,815,1759,2670,2752,5413,5594,5864,6622,6812	APOE,CAMK2A,DNM1,GFAP,GLUL,SEPTIN5,MAPK1,RAB3A,SNCA,STXBP1
5_Member	GO Biological Processes	GO:0099177	regulation of trans-synaptic signaling	-7.57196	-4.49363	10/429	348,815,1759,2670,2752,5413,5594,5864,6622,6812	APOE,CAMK2A,DNM1,GFAP,GLUL,SEPTIN5,MAPK1,RAB3A,SNCA,STXBP1
5_Member	GO Biological Processes	GO:0001505	regulation of neurotransmitter levels	-7.29833	-4.41404	8/211	815,2670,5413,5864,6622,6812,6854,11315	CAMK2A,GFAP,SEPTIN5,RAB3A,SNCA,STXBP1,SYN2,PARK7
5_Member	GO Biological Processes	GO:0051588	regulation of neurotransmitter transport	-7.1247	-4.24042	6/99	815,2670,5413,5864,6622,6812	CAMK2A,GFAP,SEPTIN5,RAB3A,SNCA,STXBP1
5_Member	GO Biological Processes	GO:0031338	regulation of vesicle fusion	-6.85817	-4.07285	4/22	5864,6622,6812,11151	RAB3A,SNCA,STXBP1,CORO1A
5_Member	GO Biological Processes	GO:0048167	regulation of synaptic plasticity	-6.64247	-3.90856	7/197	348,815,2670,5594,5864,6622,6812	APOE,CAMK2A,GFAP,MAPK1,RAB3A,SNCA,STXBP1
5_Member	KEGG Pathway	hsa04721	Synaptic vesicle cycle	-6.1325	-3.49229	5/78	526,1759,4905,5864,6812	ATP6V1B2,DNM1,NSF,RAB3A,STXBP1
5_Member	GO Biological Processes	GO:0045055	regulated exocytosis	-6.12366	-3.5404	6/128	5413,5864,6622,6812,6854,11151	SEPTIN5,RAB3A,SNCA,STXBP1,SYN2,CORO1A
5_Member	GO Biological Processes	GO:0006836	neurotransmitter transport	-6.0646	-3.50118	6/131	5413,5864,6622,6812,6854,11315	SEPTIN5,RAB3A,SNCA,STXBP1,SYN2,PARK7
5_Member	GO Biological Processes	GO:0046928	regulation of neurotransmitter secretion	-5.92085	-3.31453	5/86	815,5413,5864,6622,6812	CAMK2A,SEPTIN5,RAB3A,SNCA,STXBP1
5_Member	GO Biological Processes	GO:0006887	exocytosis	-5.89106	-3.37045	7/223	4905,5413,5864,6622,6812,6854,11151	NSF,SEPTIN5,RAB3A,SNCA,STXBP1,SYN2,CORO1A
5_Member	GO Biological Processes	GO:0007269	neurotransmitter secretion	-5.82271	-3.33336	5/79	5413,5864,6622,6812,6854	SEPTIN5,RAB3A,SNCA,STXBP1,SYN2
5_Member	GO Biological Processes	GO:0099643	signal release from synapse	-5.82271	-3.33336	5/79	5413,5864,6622,6812,6854	SEPTIN5,RAB3A,SNCA,STXBP1,SYN2
5_Member	GO Biological Processes	GO:0060627	regulation of vesicle-mediated transport	-5.71326	-3.20542	9/529	348,4905,5413,5594,5864,6622,6812,11151,30844	APOE,NSF,SEPTIN5,MAPK1,RAB3A,SNCA,STXBP1,CORO1A,EHD4
5_Member	GO Biological Processes	GO:0051640	organelle localization	-5.65111	-3.19652	9/470	372,1759,4976,5413,5864,6622,6812,6854,7345	ARCN1,DNM1,OPA1,SEPTIN5,RAB3A,SNCA,STXBP1,SYN2,UCHL1
5_Member	GO Biological Processes	GO:0023061	signal release	-5.60615	-3.18286	6/157	5413,5864,6622,6812,6854,11315	SEPTIN5,RAB3A,SNCA,STXBP1,SYN2,PARK7
5_Member	GO Biological Processes	GO:0097479	synaptic vesicle localization	-5.59247	-3.18286	4/39	1759,5864,6622,6854	DNM1,RAB3A,SNCA,SYN2
5_Member	GO Biological Processes	GO:1903530	regulation of secretion by cell	-5.58172	-3.13266	9/549	348,815,2746,2752,4905,5413,5864,6622,6812	APOE,CAMK2A,GLUD1,GLUL,NSF,SEPTIN5,RAB3A,SNCA,STXBP1
5_Member	GO Biological Processes	GO:0032940	secretion by cell	-5.43893	-3.06997	8/372	4905,5413,5864,6622,6812,6854,11151,11315	NSF,SEPTIN5,RAB3A,SNCA,STXBP1,SYN2,CORO1A,PARK7
5_Member	GO Biological Processes	GO:0051046	regulation of secretion	-5.23453	-2.87531	9/606	348,815,2746,2752,4905,5413,5864,6622,6812	APOE,CAMK2A,GLUD1,GLUL,NSF,SEPTIN5,RAB3A,SNCA,STXBP1
5_Member	GO Biological Processes	GO:0016079	synaptic vesicle exocytosis	-5.18122	-2.84737	4/56	5413,5864,6622,6812	SEPTIN5,RAB3A,SNCA,STXBP1
5_Member	GO Biological Processes	GO:0140029	exocytic process	-5.03218	-2.7754	4/61	5413,5864,6622,6812	SEPTIN5,RAB3A,SNCA,STXBP1
5_Member	GO Biological Processes	GO:0140352	export from cell	-5.03168	-2.75688	8/423	4905,5413,5864,6622,6812,6854,11151,11315	NSF,SEPTIN5,RAB3A,SNCA,STXBP1,SYN2,CORO1A,PARK7
5_Member	GO Biological Processes	GO:0046903	secretion	-4.60518	-2.45162	8/485	4905,5413,5864,6622,6812,6854,11151,11315	NSF,SEPTIN5,RAB3A,SNCA,STXBP1,SYN2,CORO1A,PARK7
5_Member	GO Biological Processes	GO:0016050	vesicle organization	-4.51215	-2.39078	6/279	1759,5864,6622,6812,11151,23603	DNM1,RAB3A,SNCA,STXBP1,CORO1A,CORO1C
5_Member	GO Biological Processes	GO:0051648	vesicle localization	-4.39413	-2.29048	5/155	1759,5413,5864,6622,6854	DNM1,SEPTIN5,RAB3A,SNCA,SYN2
5_Member	GO Biological Processes	GO:0048489	synaptic vesicle transport	-4.30519	-2.24406	3/33	1759,5864,6622	DNM1,RAB3A,SNCA
5_Member	GO Biological Processes	GO:0017157	regulation of exocytosis	-4.09989	-2.07543	5/204	4905,5413,5864,6622,6812	NSF,SEPTIN5,RAB3A,SNCA,STXBP1
5_Member	GO Biological Processes	GO:0051656	establishment of organelle localization	-4.023	-2.02267	6/342	1759,4976,5413,5864,6622,7345	DNM1,OPA1,SEPTIN5,RAB3A,SNCA,UCHL1
5_Member	GO Biological Processes	GO:0051650	establishment of vesicle localization	-3.56133	-1.6508	4/145	1759,5413,5864,6622	DNM1,SEPTIN5,RAB3A,SNCA
5_Member	GO Biological Processes	GO:1903532	positive regulation of secretion by cell	-3.50389	-1.60899	5/274	2746,2752,5864,6622,6812	GLUD1,GLUL,RAB3A,SNCA,STXBP1
5_Member	GO Biological Processes	GO:0051047	positive regulation of secretion	-3.32424	-1.46891	5/300	2746,2752,5864,6622,6812	GLUD1,GLUL,RAB3A,SNCA,STXBP1
5_Member	GO Biological Processes	GO:0045921	positive regulation of exocytosis	-3.11215	-1.29822	3/83	5864,6622,6812	RAB3A,SNCA,STXBP1
5_Member	GO Biological Processes	GO:0072659	protein localization to plasma membrane	-3.07685	-1.27049	4/195	4905,5864,6812,30844	NSF,RAB3A,STXBP1,EHD4
5_Member	GO Biological Processes	GO:0051952	regulation of amine transport	-2.98244	-1.19446	3/92	5864,6622,6812	RAB3A,SNCA,STXBP1
5_Member	GO Biological Processes	GO:1990778	protein localization to cell periphery	-2.7918	-1.04281	4/233	4905,5864,6812,30844	NSF,RAB3A,STXBP1,EHD4
5_Member	GO Biological Processes	GO:0048284	organelle fusion	-2.74798	-1.00227	3/111	4976,6622,6812	OPA1,SNCA,STXBP1
5_Member	GO Biological Processes	GO:0001775	cell activation	-2.61047	-0.890124	6/636	60,3251,6622,6812,10419,11151	ACTB,HPRT1,SNCA,STXBP1,PRMT5,CORO1A
5_Member	GO Biological Processes	GO:0072657	protein localization to membrane	-2.57935	-0.863088	5/442	348,4905,5864,6812,30844	APOE,NSF,RAB3A,STXBP1,EHD4
5_Member	GO Biological Processes	GO:1903305	regulation of regulated secretory pathway	-2.46232	-0.763014	3/140	5413,5864,6812	SEPTIN5,RAB3A,STXBP1
5_Member	GO Biological Processes	GO:0061025	membrane fusion	-2.44503	-0.748648	3/142	4905,6622,6812	NSF,SNCA,STXBP1
5_Member	GO Biological Processes	GO:0051668	localization within membrane	-2.29794	-0.631586	5/515	348,4905,5864,6812,30844	APOE,NSF,RAB3A,STXBP1,EHD4
6_Summary	GO Biological Processes	GO:0043254	regulation of protein-containing complex assembly	-9.03353	-5.58994	11/401	348,2670,5864,6622,6624,6812,7415,11151,11315,22933,29767,1400,2665,4155,4976,23603,5594,60,1808	APOE,GFAP,RAB3A,SNCA,FSCN1,STXBP1,VCP,CORO1A,PARK7,SIRT2,TMOD2,CRMP1,GDI2,MBP,OPA1,CORO1C,MAPK1,ACTB,DPYSL2
6_Member	GO Biological Processes	GO:0043254	regulation of protein-containing complex assembly	-9.03353	-5.58994	11/401	348,2670,5864,6622,6624,6812,7415,11151,11315,22933,29767	APOE,GFAP,RAB3A,SNCA,FSCN1,STXBP1,VCP,CORO1A,PARK7,SIRT2,TMOD2
6_Member	GO Biological Processes	GO:0051129	negative regulation of cellular component organization	-7.96629	-5.03458	13/684	348,1400,2665,2670,4155,4976,6622,6812,11151,11315,22933,23603,29767	APOE,CRMP1,GDI2,GFAP,MBP,OPA1,SNCA,STXBP1,CORO1A,PARK7,SIRT2,CORO1C,TMOD2
6_Member	GO Biological Processes	GO:1902904	negative regulation of supramolecular fiber organization	-3.36859	-1.49758	4/163	348,6622,11151,29767	APOE,SNCA,CORO1A,TMOD2
6_Member	GO Biological Processes	GO:0010639	negative regulation of organelle organization	-3.11392	-1.29822	5/334	2665,4976,6622,11151,29767	GDI2,OPA1,SNCA,CORO1A,TMOD2
6_Member	GO Biological Processes	GO:0097435	supramolecular fiber organization	-3.04498	-1.24484	6/522	2670,6622,6624,11151,23603,29767	GFAP,SNCA,FSCN1,CORO1A,CORO1C,TMOD2
6_Member	GO Biological Processes	GO:1902903	regulation of supramolecular fiber organization	-2.89032	-1.1257	5/375	348,6622,11151,11315,29767	APOE,SNCA,CORO1A,PARK7,TMOD2
6_Member	GO Biological Processes	GO:0007015	actin filament organization	-2.57736	-0.862116	4/267	6624,11151,23603,29767	FSCN1,CORO1A,CORO1C,TMOD2
6_Member	GO Biological Processes	GO:0051494	negative regulation of cytoskeleton organization	-2.30795	-0.639301	3/159	6622,11151,29767	SNCA,CORO1A,TMOD2
6_Member	GO Biological Processes	GO:0051493	regulation of cytoskeleton organization	-2.26312	-0.60574	5/525	5594,6622,6624,11151,29767	MAPK1,SNCA,FSCN1,CORO1A,TMOD2
6_Member	GO Biological Processes	GO:0030036	actin cytoskeleton organization	-2.21236	-0.564648	5/540	60,6624,11151,23603,29767	ACTB,FSCN1,CORO1A,CORO1C,TMOD2
6_Member	GO Biological Processes	GO:0032535	regulation of cellular component size	-2.158	-0.517176	4/351	348,1808,11151,29767	APOE,DPYSL2,CORO1A,TMOD2
6_Member	GO Biological Processes	GO:0032271	regulation of protein polymerization	-2.02852	-0.404325	3/201	6622,11151,29767	SNCA,CORO1A,TMOD2
6_Member	GO Biological Processes	GO:0030029	actin filament-based process	-2.01948	-0.397072	5/602	60,6624,11151,23603,29767	ACTB,FSCN1,CORO1A,CORO1C,TMOD2
7_Summary	Reactome Gene Sets	R-HSA-390450	Folding of actin by CCT/TriC	-8.16204	-5.17709	4/10	60,10574,10576,22948,2782,2783,2665,2752,5594,6622,6812,7415,7531,11151,11315,1759,6624,22933,10808,5864,348,2746,10419,10963	ACTB,CCT7,CCT2,CCT5,GNB1,GNB2,GDI2,GLUL,MAPK1,SNCA,STXBP1,VCP,YWHAE,CORO1A,PARK7,DNM1,FSCN1,SIRT2,HSPH1,RAB3A,APOE,GLUD1,PRMT5,STIP1
7_Member	Reactome Gene Sets	R-HSA-390450	Folding of actin by CCT/TriC	-8.16204	-5.17709	4/10	60,10574,10576,22948	ACTB,CCT7,CCT2,CCT5
7_Member	Reactome Gene Sets	R-HSA-6814122	Cooperation of PDCL (PhLP1) and TRiC/CCT in G-protein beta folding	-7.44108	-4.54155	5/38	2782,2783,10574,10576,22948	GNB1,GNB2,CCT7,CCT2,CCT5
7_Member	GO Biological Processes	GO:0060341	regulation of cellular localization	-7.24663	-4.37706	13/788	60,2665,2752,5594,6622,6812,7415,7531,10574,10576,11151,11315,22948	ACTB,GDI2,GLUL,MAPK1,SNCA,STXBP1,VCP,YWHAE,CCT7,CCT2,CORO1A,PARK7,CCT5
7_Member	Reactome Gene Sets	R-HSA-390466	Chaperonin-mediated protein folding	-7.00311	-4.21272	6/91	60,2782,2783,10574,10576,22948	ACTB,GNB1,GNB2,CCT7,CCT2,CCT5
7_Member	Reactome Gene Sets	R-HSA-391251	Protein folding	-6.83714	-4.10324	6/97	60,2782,2783,10574,10576,22948	ACTB,GNB1,GNB2,CCT7,CCT2,CCT5
7_Member	Reactome Gene Sets	R-HSA-389957	Prefoldin mediated transfer of substrate to CCT/TriC	-6.18753	-3.58233	4/28	60,10574,10576,22948	ACTB,CCT7,CCT2,CCT5
7_Member	Reactome Gene Sets	R-HSA-389958	Cooperation of Prefoldin and TriC/CCT in actin and tubulin folding	-5.94616	-3.40565	4/32	60,10574,10576,22948	ACTB,CCT7,CCT2,CCT5
7_Member	GO Biological Processes	GO:0032212	positive regulation of telomere maintenance via telomerase	-5.83729	-3.33571	4/34	5594,10574,10576,22948	MAPK1,CCT7,CCT2,CCT5
7_Member	GO Biological Processes	GO:1904358	positive regulation of telomere maintenance via telomere lengthening	-5.68616	-3.22029	4/37	5594,10574,10576,22948	MAPK1,CCT7,CCT2,CCT5
7_Member	GO Biological Processes	GO:1901998	toxin transport	-5.59247	-3.18286	4/39	1759,10574,10576,22948	DNM1,CCT7,CCT2,CCT5
7_Member	GO Biological Processes	GO:0032206	positive regulation of telomere maintenance	-5.08554	-2.78807	4/52	5594,10574,10576,22948	MAPK1,CCT7,CCT2,CCT5
7_Member	GO Biological Processes	GO:0032210	regulation of telomere maintenance via telomerase	-5.05226	-2.76627	4/53	5594,10574,10576,22948	MAPK1,CCT7,CCT2,CCT5
7_Member	GO Biological Processes	GO:0031647	regulation of protein stability	-5.04358	-2.76135	7/300	5594,6622,6812,10574,10576,11315,22948	MAPK1,SNCA,STXBP1,CCT7,CCT2,PARK7,CCT5
7_Member	GO Biological Processes	GO:1904356	regulation of telomere maintenance via telomere lengthening	-4.80775	-2.60094	4/61	5594,10574,10576,22948	MAPK1,CCT7,CCT2,CCT5
7_Member	GO Biological Processes	GO:1900180	regulation of protein localization to nucleus	-4.72894	-2.54062	5/132	2752,10574,10576,11315,22948	GLUL,CCT7,CCT2,PARK7,CCT5
7_Member	GO Biological Processes	GO:0010638	positive regulation of organelle organization	-4.59881	-2.44803	8/486	5594,6622,6624,10574,10576,11315,22933,22948	MAPK1,SNCA,FSCN1,CCT7,CCT2,PARK7,SIRT2,CCT5
7_Member	GO Biological Processes	GO:0061077	chaperone-mediated protein folding	-4.54583	-2.41663	4/71	10574,10576,10808,22948	CCT7,CCT2,HSPH1,CCT5
7_Member	GO Biological Processes	GO:0007338	single fertilization	-4.53268	-2.4061	5/145	5864,10574,10576,11315,22948	RAB3A,CCT7,CCT2,PARK7,CCT5
7_Member	GO Biological Processes	GO:2000573	positive regulation of DNA biosynthetic process	-4.49814	-2.37676	4/73	5594,10574,10576,22948	MAPK1,CCT7,CCT2,CCT5
7_Member	WikiPathways	WP4949	16p11.2 proximal deletion syndrome	-4.42913	-2.31797	4/76	10574,10576,11151,22948	CCT7,CCT2,CORO1A,CCT5
7_Member	GO Biological Processes	GO:0070201	regulation of establishment of protein localization	-4.39098	-2.2898	8/520	348,2746,2752,7531,10574,10576,11315,22948	APOE,GLUD1,GLUL,YWHAE,CCT7,CCT2,PARK7,CCT5
7_Member	GO Biological Processes	GO:0032204	regulation of telomere maintenance	-4.34147	-2.25005	4/80	5594,10574,10576,22948	MAPK1,CCT7,CCT2,CCT5
7_Member	GO Biological Processes	GO:1900182	positive regulation of protein localization to nucleus	-4.25832	-2.1858	4/84	10574,10576,11315,22948	CCT7,CCT2,PARK7,CCT5
7_Member	GO Biological Processes	GO:2001252	positive regulation of chromosome organization	-4.14116	-2.08894	4/90	5594,10574,10576,22948	MAPK1,CCT7,CCT2,CCT5
7_Member	GO Biological Processes	GO:0009566	fertilization	-4.03001	-1.99295	5/185	5864,10574,10576,11315,22948	RAB3A,CCT7,CCT2,PARK7,CCT5
7_Member	GO Biological Processes	GO:0050821	protein stabilization	-3.96489	-1.93835	5/191	6812,10574,10576,11315,22948	STXBP1,CCT7,CCT2,PARK7,CCT5
7_Member	GO Biological Processes	GO:1903829	positive regulation of protein localization	-3.95102	-1.92655	7/446	2746,2752,7531,10574,10576,11315,22948	GLUD1,GLUL,YWHAE,CCT7,CCT2,PARK7,CCT5
7_Member	GO Biological Processes	GO:1904951	positive regulation of establishment of protein localization	-3.94813	-1.92573	6/309	2746,2752,7531,10574,10576,22948	GLUD1,GLUL,YWHAE,CCT7,CCT2,CCT5
7_Member	GO Biological Processes	GO:2000278	regulation of DNA biosynthetic process	-3.67197	-1.70003	4/119	5594,10574,10576,22948	MAPK1,CCT7,CCT2,CCT5
7_Member	GO Biological Processes	GO:0051054	positive regulation of DNA metabolic process	-3.58091	-1.61983	5/231	60,5594,10574,10576,22948	ACTB,MAPK1,CCT7,CCT2,CCT5
7_Member	GO Biological Processes	GO:0051052	regulation of DNA metabolic process	-3.32386	-1.40369	6/404	60,5594,10419,10574,10576,22948	ACTB,MAPK1,PRMT5,CCT7,CCT2,CCT5
7_Member	GO Biological Processes	GO:0006457	protein folding	-2.78654	-0.955726	4/205	10574,10576,10808,22948	CCT7,CCT2,HSPH1,CCT5
7_Member	Reactome Gene Sets	R-HSA-194315	Signaling by Rho GTPases	-2.76232	-0.936769	7/707	60,5594,7415,7531,10574,10576,10963	ACTB,MAPK1,VCP,YWHAE,CCT7,CCT2,STIP1
7_Member	Reactome Gene Sets	R-HSA-9716542	Signaling by Rho GTPases, Miro GTPases and RHOBTB3	-2.70743	-0.892226	7/723	60,5594,7415,7531,10574,10576,10963	ACTB,MAPK1,VCP,YWHAE,CCT7,CCT2,STIP1
7_Member	Reactome Gene Sets	R-HSA-1852241	Organelle biogenesis and maintenance	-2.41738	-0.724876	4/296	2746,7531,10576,22948	GLUD1,YWHAE,CCT2,CCT5
7_Member	GO Biological Processes	GO:0051223	regulation of protein transport	-2.37008	-0.688972	5/495	348,2746,2752,7531,11315	APOE,GLUD1,GLUL,YWHAE,PARK7
7_Member	Reactome Gene Sets	R-HSA-5617833	Cilium Assembly	-2.02852	-0.404325	3/201	7531,10576,22948	YWHAE,CCT2,CCT5
8_Summary	Reactome Gene Sets	R-HSA-112315	Transmission across Chemical Synapses	-7.67381	-4.75849	9/270	815,2752,2782,2783,4905,5594,5864,6812,6854,2775,6622,22933,1759,47,7086,7531,60,348,5162,3251,7345	CAMK2A,GLUL,GNB1,GNB2,NSF,MAPK1,RAB3A,STXBP1,SYN2,GNAO1,SNCA,SIRT2,DNM1,ACLY,TKT,YWHAE,ACTB,APOE,PDHB,HPRT1,UCHL1
8_Member	Reactome Gene Sets	R-HSA-112315	Transmission across Chemical Synapses	-7.67381	-4.75849	9/270	815,2752,2782,2783,4905,5594,5864,6812,6854	CAMK2A,GLUL,GNB1,GNB2,NSF,MAPK1,RAB3A,STXBP1,SYN2
8_Member	Reactome Gene Sets	R-HSA-112316	Neuronal System	-6.13915	-3.54834	9/410	815,2752,2782,2783,4905,5594,5864,6812,6854	CAMK2A,GLUL,GNB1,GNB2,NSF,MAPK1,RAB3A,STXBP1,SYN2
8_Member	KEGG Pathway	hsa04727	GABAergic synapse	-5.84679	-3.26978	5/89	2752,2775,2782,2783,4905	GLUL,GNAO1,GNB1,GNB2,NSF
8_Member	WikiPathways	WP2355	Corticotropin-releasing hormone signaling pathway	-5.75202	-3.23141	5/93	815,2775,2782,2783,5594	CAMK2A,GNAO1,GNB1,GNB2,MAPK1
8_Member	GO Biological Processes	GO:0071868	cellular response to monoamine stimulus	-5.66146	-3.18401	5/97	2775,2782,5594,6622,22933	GNAO1,GNB1,MAPK1,SNCA,SIRT2
8_Member	GO Biological Processes	GO:0071870	cellular response to catecholamine stimulus	-5.66146	-3.18401	5/97	2775,2782,5594,6622,22933	GNAO1,GNB1,MAPK1,SNCA,SIRT2
8_Member	KEGG Pathway	hsa04713	Circadian entrainment	-5.66146	-3.18401	5/97	815,2775,2782,2783,5594	CAMK2A,GNAO1,GNB1,GNB2,MAPK1
8_Member	Canonical Pathways	M222	PID CXCR3 PATHWAY	-5.64576	-3.17414	4/43	1759,2775,2782,5594	DNM1,GNAO1,GNB1,MAPK1
8_Member	GO Biological Processes	GO:0071867	response to monoamine	-5.59609	-3.1415	5/100	2775,2782,5594,6622,22933	GNAO1,GNB1,MAPK1,SNCA,SIRT2
8_Member	GO Biological Processes	GO:0071869	response to catecholamine	-5.59609	-3.1415	5/100	2775,2782,5594,6622,22933	GNAO1,GNB1,MAPK1,SNCA,SIRT2
8_Member	KEGG Pathway	hsa04725	Cholinergic synapse	-5.33489	-2.9459	5/113	815,2775,2782,2783,5594	CAMK2A,GNAO1,GNB1,GNB2,MAPK1
8_Member	KEGG Pathway	hsa04724	Glutamatergic synapse	-5.31613	-2.93793	5/114	2752,2775,2782,2783,5594	GLUL,GNAO1,GNB1,GNB2,MAPK1
8_Member	Reactome Gene Sets	R-HSA-163685	Integration of energy metabolism	-5.1524	-2.84711	5/108	47,2782,2783,6812,7086	ACLY,GNB1,GNB2,STXBP1,TKT
8_Member	Reactome Gene Sets	R-HSA-4086398	Ca2+ pathway	-5.00391	-2.75414	4/62	815,2775,2782,2783	CAMK2A,GNAO1,GNB1,GNB2
8_Member	WikiPathways	WP536	Calcium regulation in cardiac cells	-4.70896	-2.53253	5/152	815,2775,2782,2783,7531	CAMK2A,GNAO1,GNB1,GNB2,YWHAE
8_Member	Canonical Pathways	M213	PID AR NONGENOMIC PATHWAY	-4.388	-2.299	3/31	2775,2782,5594	GNAO1,GNB1,MAPK1
8_Member	Reactome Gene Sets	R-HSA-456926	Thrombin signalling through proteinase activated receptors (PARs)	-4.34592	-2.27356	3/32	2782,2783,5594	GNB1,GNB2,MAPK1
8_Member	Reactome Gene Sets	R-HSA-111885	Opioid Signalling	-4.32518	-2.25953	4/92	815,2782,2783,5594	CAMK2A,GNB1,GNB2,MAPK1
8_Member	Reactome Gene Sets	R-HSA-112314	Neurotransmitter receptors and postsynaptic signal transmission	-4.08988	-2.0689	5/205	815,2782,2783,4905,5594	CAMK2A,GNB1,GNB2,NSF,MAPK1
8_Member	Canonical Pathways	M238	PID THROMBIN PAR1 PATHWAY	-3.95739	-1.97243	3/43	1759,2775,2782	DNM1,GNAO1,GNB1
8_Member	KEGG Pathway	hsa04726	Serotonergic synapse	-3.94783	-1.96663	4/115	2775,2782,2783,5594	GNAO1,GNB1,GNB2,MAPK1
8_Member	KEGG Pathway	hsa04926	Relaxin signaling pathway	-3.75553	-1.81197	4/129	2775,2782,2783,5594	GNAO1,GNB1,GNB2,MAPK1
8_Member	KEGG Pathway	hsa04728	Dopaminergic synapse	-3.71723	-1.77708	4/132	815,2775,2782,2783	CAMK2A,GNAO1,GNB1,GNB2
8_Member	GO Biological Processes	GO:0071417	cellular response to organonitrogen compound	-3.64046	-1.71374	7/573	60,815,2775,2782,5594,6622,22933	ACTB,CAMK2A,GNAO1,GNB1,MAPK1,SNCA,SIRT2
8_Member	Reactome Gene Sets	R-HSA-3858494	Beta-catenin independent WNT signaling	-3.54996	-1.64575	4/146	815,2775,2782,2783	CAMK2A,GNAO1,GNB1,GNB2
8_Member	KEGG Pathway	hsa04723	Retrograde endocannabinoid signaling	-3.52747	-1.62639	4/148	2775,2782,2783,5594	GNAO1,GNB1,GNB2,MAPK1
8_Member	GO Biological Processes	GO:1901699	cellular response to nitrogen compound	-3.3841	-1.50871	7/632	60,815,2775,2782,5594,6622,22933	ACTB,CAMK2A,GNAO1,GNB1,MAPK1,SNCA,SIRT2
8_Member	WikiPathways	WP2032	Thyroid stimulating hormone (TSH) signaling pathway	-3.36542	-1.49586	3/68	2775,2782,5594	GNAO1,GNB1,MAPK1
8_Member	Reactome Gene Sets	R-HSA-9006931	Signaling by Nuclear Receptors	-3.33082	-1.47269	5/299	348,2782,2783,5162,5594	APOE,GNB1,GNB2,PDHB,MAPK1
8_Member	Reactome Gene Sets	R-HSA-9009391	Extra-nuclear estrogen signaling	-3.20717	-1.36909	3/77	2782,2783,5594	GNB1,GNB2,MAPK1
8_Member	Reactome Gene Sets	R-HSA-422356	Regulation of insulin secretion	-3.1908	-1.35734	3/78	2782,2783,6812	GNB1,GNB2,STXBP1
8_Member	KEGG Pathway	hsa05034	Alcoholism	-3.14463	-1.31777	4/187	2775,2782,2783,5594	GNAO1,GNB1,GNB2,MAPK1
8_Member	GO Biological Processes	GO:0071407	cellular response to organic cyclic compound	-3.12383	-1.30478	6/504	60,2775,2782,5594,6622,22933	ACTB,GNAO1,GNB1,MAPK1,SNCA,SIRT2
8_Member	GO Biological Processes	GO:1903351	cellular response to dopamine	-3.11215	-1.29822	3/83	2775,2782,5594	GNAO1,GNB1,MAPK1
8_Member	GO Biological Processes	GO:1903350	response to dopamine	-3.09702	-1.28816	3/84	2775,2782,5594	GNAO1,GNB1,MAPK1
8_Member	KEGG Pathway	hsa05032	Morphine addiction	-2.99617	-1.20458	3/91	2775,2782,2783	GNAO1,GNB1,GNB2
8_Member	KEGG Pathway	hsa05170	Human immunodeficiency virus 1 infection	-2.94239	-1.16136	4/212	2775,2782,2783,5594	GNAO1,GNB1,GNB2,MAPK1
8_Member	WikiPathways	WP35	G protein signaling pathways	-2.92904	-1.1529	3/96	2775,2782,2783	GNAO1,GNB1,GNB2
8_Member	Canonical Pathways	M124	PID CXCR4 PATHWAY	-2.87796	-1.11561	3/100	1759,2775,2782	DNM1,GNAO1,GNB1
8_Member	KEGG Pathway	hsa05163	Human cytomegalovirus infection	-2.84733	-1.08948	4/225	2775,2782,2783,5594	GNAO1,GNB1,GNB2,MAPK1
8_Member	Reactome Gene Sets	R-HSA-9658195	Leishmania infection	-2.65555	-0.923758	4/254	60,2782,2783,5594	ACTB,GNB1,GNB2,MAPK1
8_Member	KEGG Pathway	hsa04371	Apelin signaling pathway	-2.47106	-0.769799	3/139	2782,2783,5594	GNB1,GNB2,MAPK1
8_Member	GO Biological Processes	GO:0008283	cell population proliferation	-2.3924	-0.705632	5/489	2752,2782,3251,5594,7345	GLUL,GNB1,HPRT1,MAPK1,UCHL1
8_Member	Reactome Gene Sets	R-HSA-418594	G alpha (i) signalling events	-2.30747	-0.639301	4/318	815,2782,2783,5594	CAMK2A,GNB1,GNB2,MAPK1
8_Member	WikiPathways	WP3929	Chemokine signaling pathway	-2.26335	-0.60574	3/165	2782,2783,5594	GNB1,GNB2,MAPK1
8_Member	Reactome Gene Sets	R-HSA-195721	Signaling by WNT	-2.24196	-0.589006	4/332	815,2775,2782,2783	CAMK2A,GNAO1,GNB1,GNB2
8_Member	KEGG Pathway	hsa04151	PI3K-Akt signaling pathway	-2.14522	-0.506959	4/354	2782,2783,5594,7531	GNB1,GNB2,MAPK1,YWHAE
8_Member	WikiPathways	WP4223	Ras signaling	-2.12662	-0.490052	3/185	2782,2783,5594	GNB1,GNB2,MAPK1
8_Member	KEGG Pathway	hsa04062	Chemokine signaling pathway	-2.08259	-0.45023	3/192	2782,2783,5594	GNB1,GNB2,MAPK1
8_Member	KEGG Pathway	hsa05167	Kaposi sarcoma-associated herpesvirus infection	-2.07033	-0.439649	3/194	2782,2783,5594	GNB1,GNB2,MAPK1
9_Summary	Reactome Gene Sets	R-HSA-437239	Recycling pathway of L1	-7.24892	-4.31721	5/47	60,1759,1808,5594,6456,348,6620,6622,30844,815,6812,526,2670,1973,1400,4155,56904	ACTB,DNM1,DPYSL2,MAPK1,SH3GL2,APOE,SNCB,SNCA,EHD4,CAMK2A,STXBP1,ATP6V1B2,GFAP,EIF4A1,CRMP1,MBP,SH3GLB2
9_Member	Reactome Gene Sets	R-HSA-437239	Recycling pathway of L1	-7.24892	-4.31721	5/47	60,1759,1808,5594,6456	ACTB,DNM1,DPYSL2,MAPK1,SH3GL2
9_Member	GO Biological Processes	GO:0006897	endocytosis	-5.99384	-3.36316	9/489	60,348,1759,1808,5594,6456,6620,6622,30844	ACTB,APOE,DNM1,DPYSL2,MAPK1,SH3GL2,SNCB,SNCA,EHD4
9_Member	Reactome Gene Sets	R-HSA-373760	L1CAM interactions	-5.22487	-2.87531	5/119	60,1759,1808,5594,6456	ACTB,DNM1,DPYSL2,MAPK1,SH3GL2
9_Member	WikiPathways	WP437	EGF/EGFR signaling pathway	-4.56316	-2.42866	5/163	815,1759,5594,6456,6812	CAMK2A,DNM1,MAPK1,SH3GL2,STXBP1
9_Member	Reactome Gene Sets	R-HSA-9006934	Signaling by Receptor Tyrosine Kinases	-3.89331	-1.9177	7/521	60,348,526,1759,2670,5594,6456	ACTB,APOE,ATP6V1B2,DNM1,GFAP,MAPK1,SH3GL2
9_Member	WikiPathways	WP4549	Fragile X syndrome	-3.83508	-1.87579	4/123	815,1759,1973,5594	CAMK2A,DNM1,EIF4A1,MAPK1
9_Member	Canonical Pathways	M187	PID TRKR PATHWAY	-3.50456	-1.60899	3/61	1759,5594,30844	DNM1,MAPK1,EHD4
9_Member	Reactome Gene Sets	R-HSA-9675108	Nervous system development	-3.27369	-1.35998	7/577	60,1400,1759,1808,4155,5594,6456	ACTB,CRMP1,DNM1,DPYSL2,MBP,MAPK1,SH3GL2
9_Member	Reactome Gene Sets	R-HSA-422475	Axon guidance	-2.9204	-1.1489	6/552	60,1400,1759,1808,5594,6456	ACTB,CRMP1,DNM1,DPYSL2,MAPK1,SH3GL2
9_Member	Reactome Gene Sets	R-HSA-187037	Signaling by NTRK1 (TRKA)	-2.7041	-0.964865	3/115	1759,5594,6456	DNM1,MAPK1,SH3GL2
9_Member	KEGG Pathway	hsa04144	Endocytosis	-2.66797	-0.931947	4/252	1759,6456,30844,56904	DNM1,SH3GL2,EHD4,SH3GLB2
9_Member	Reactome Gene Sets	R-HSA-166520	Signaling by NTRKs	-2.51584	-0.808637	3/134	1759,5594,6456	DNM1,MAPK1,SH3GL2
9_Member	Reactome Gene Sets	R-HSA-8856828	Clathrin-mediated endocytosis	-2.41122	-0.719677	3/146	60,1759,6456	ACTB,DNM1,SH3GL2
10_Summary	GO Biological Processes	GO:0021762	substantia nigra development	-7.11086	-4.25554	5/44	60,2746,4155,7531,22933,372,1808,3251,5594	ACTB,GLUD1,MBP,YWHAE,SIRT2,ARCN1,DPYSL2,HPRT1,MAPK1
10_Member	GO Biological Processes	GO:0021762	substantia nigra development	-7.11086	-4.25554	5/44	60,2746,4155,7531,22933	ACTB,GLUD1,MBP,YWHAE,SIRT2
10_Member	GO Biological Processes	GO:0048857	neural nucleus development	-6.28101	-3.6586	5/64	60,2746,4155,7531,22933	ACTB,GLUD1,MBP,YWHAE,SIRT2
10_Member	GO Biological Processes	GO:0030901	midbrain development	-5.66467	-3.20448	5/85	60,2746,4155,7531,22933	ACTB,GLUD1,MBP,YWHAE,SIRT2
10_Member	GO Biological Processes	GO:0060322	head development	-3.89093	-1.87262	9/787	60,372,1808,2746,3251,4155,5594,7531,22933	ACTB,ARCN1,DPYSL2,GLUD1,HPRT1,MBP,MAPK1,YWHAE,SIRT2
10_Member	GO Biological Processes	GO:0007420	brain development	-3.33641	-1.41243	8/742	60,372,1808,2746,3251,4155,7531,22933	ACTB,ARCN1,DPYSL2,GLUD1,HPRT1,MBP,YWHAE,SIRT2
11_Summary	GO Biological Processes	GO:0031175	neuron projection development	-6.95625	-4.14104	11/639	60,348,815,1400,1808,2670,3251,5864,6456,6812,7345,29767	ACTB,APOE,CAMK2A,CRMP1,DPYSL2,GFAP,HPRT1,RAB3A,SH3GL2,STXBP1,UCHL1,TMOD2
11_Member	GO Biological Processes	GO:0031175	neuron projection development	-6.95625	-4.14104	11/639	60,348,815,1400,1808,2670,3251,5864,6456,6812,7345	ACTB,APOE,CAMK2A,CRMP1,DPYSL2,GFAP,HPRT1,RAB3A,SH3GL2,STXBP1,UCHL1
11_Member	GO Biological Processes	GO:0032989	cellular component morphogenesis	-5.43079	-3.02363	9/573	60,1400,1808,3251,5864,6456,6812,7345,29767	ACTB,CRMP1,DPYSL2,HPRT1,RAB3A,SH3GL2,STXBP1,UCHL1,TMOD2
11_Member	GO Biological Processes	GO:0048812	neuron projection morphogenesis	-5.22712	-2.87531	8/455	60,1400,1808,3251,5864,6456,6812,7345	ACTB,CRMP1,DPYSL2,HPRT1,RAB3A,SH3GL2,STXBP1,UCHL1
11_Member	GO Biological Processes	GO:0120039	plasma membrane bounded cell projection morphogenesis	-5.1994	-2.86132	8/459	60,1400,1808,3251,5864,6456,6812,7345	ACTB,CRMP1,DPYSL2,HPRT1,RAB3A,SH3GL2,STXBP1,UCHL1
11_Member	GO Biological Processes	GO:0048858	cell projection morphogenesis	-5.17195	-2.8423	8/463	60,1400,1808,3251,5864,6456,6812,7345	ACTB,CRMP1,DPYSL2,HPRT1,RAB3A,SH3GL2,STXBP1,UCHL1
11_Member	GO Biological Processes	GO:0032990	cell part morphogenesis	-5.04508	-2.77757	8/482	60,1400,1808,3251,5864,6456,6812,7345	ACTB,CRMP1,DPYSL2,HPRT1,RAB3A,SH3GL2,STXBP1,UCHL1
11_Member	GO Biological Processes	GO:0048667	cell morphogenesis involved in neuron differentiation	-4.53867	-2.40683	7/411	60,1400,1808,3251,5864,6812,7345	ACTB,CRMP1,DPYSL2,HPRT1,RAB3A,STXBP1,UCHL1
11_Member	GO Biological Processes	GO:0007409	axonogenesis	-4.023	-2.02267	6/342	60,1400,1808,5864,6812,7345	ACTB,CRMP1,DPYSL2,RAB3A,STXBP1,UCHL1
11_Member	GO Biological Processes	GO:0000902	cell morphogenesis	-4.01789	-2.01951	8/673	60,1400,1808,3251,5864,6456,6812,7345	ACTB,CRMP1,DPYSL2,HPRT1,RAB3A,SH3GL2,STXBP1,UCHL1
11_Member	GO Biological Processes	GO:0000904	cell morphogenesis involved in differentiation	-3.88818	-1.91441	7/522	60,1400,1808,3251,5864,6812,7345	ACTB,CRMP1,DPYSL2,HPRT1,RAB3A,STXBP1,UCHL1
11_Member	GO Biological Processes	GO:0061564	axon development	-3.7741	-1.82535	6/380	60,1400,1808,5864,6812,7345	ACTB,CRMP1,DPYSL2,RAB3A,STXBP1,UCHL1
12_Summary	GO Biological Processes	GO:0061024	membrane organization	-6.42426	-3.75881	12/774	348,815,1759,4155,4905,4976,5864,6622,6812,22933,23603,56904,10419	APOE,CAMK2A,DNM1,MBP,NSF,OPA1,RAB3A,SNCA,STXBP1,SIRT2,CORO1C,SH3GLB2,PRMT5
12_Member	GO Biological Processes	GO:0061024	membrane organization	-6.42426	-3.75881	12/774	348,815,1759,4155,4905,4976,5864,6622,6812,22933,23603,56904	APOE,CAMK2A,DNM1,MBP,NSF,OPA1,RAB3A,SNCA,STXBP1,SIRT2,CORO1C,SH3GLB2
12_Member	GO Biological Processes	GO:0010256	endomembrane system organization	-3.12383	-1.30478	6/504	1759,4905,5864,10419,22933,23603	DNM1,NSF,RAB3A,PRMT5,SIRT2,CORO1C
13_Summary	Canonical Pathways	M275	PID ALPHA SYNUCLEIN PATHWAY	-6.17358	-3.50814	4/32	5594,6622,7345,11315,348,6620,6812,11151,372,3251,5413,29767,6456,7531,22933,23603,23576,2670,4905,7415,1974,526,2023,815,4155,6624,3098,60,1759,2665	MAPK1,SNCA,UCHL1,PARK7,APOE,SNCB,STXBP1,CORO1A,ARCN1,HPRT1,SEPTIN5,TMOD2,SH3GL2,YWHAE,SIRT2,CORO1C,DDAH1,GFAP,NSF,VCP,EIF4A2,ATP6V1B2,ENO1,CAMK2A,MBP,FSCN1,HK1,ACTB,DNM1,GDI2
13_Member	Canonical Pathways	M275	PID ALPHA SYNUCLEIN PATHWAY	-6.17358	-3.50814	4/32	5594,6622,7345,11315	MAPK1,SNCA,UCHL1,PARK7
13_Member	GO Biological Processes	GO:0043524	negative regulation of neuron apoptotic process	-6.14221	-3.49229	6/145	348,6620,6622,6812,11151,11315	APOE,SNCB,SNCA,STXBP1,CORO1A,PARK7
13_Member	GO Biological Processes	GO:0007626	locomotory behavior	-5.51301	-3.08014	6/186	348,372,3251,6622,7345,11315	APOE,ARCN1,HPRT1,SNCA,UCHL1,PARK7
13_Member	GO Biological Processes	GO:0007610	behavior	-5.4928	-3.06519	9/563	348,372,3251,5413,5594,6622,7345,11315,29767	APOE,ARCN1,HPRT1,SEPTIN5,MAPK1,SNCA,UCHL1,PARK7,TMOD2
13_Member	GO Biological Processes	GO:0045936	negative regulation of phosphate metabolic process	-5.33354	-2.9459	8/440	348,6456,6622,7345,7531,11315,22933,23603	APOE,SH3GL2,SNCA,UCHL1,YWHAE,PARK7,SIRT2,CORO1C
13_Member	GO Biological Processes	GO:0010563	negative regulation of phosphorus metabolic process	-5.32633	-2.94343	8/441	348,6456,6622,7345,7531,11315,22933,23603	APOE,SH3GL2,SNCA,UCHL1,YWHAE,PARK7,SIRT2,CORO1C
13_Member	GO Biological Processes	GO:0043523	regulation of neuron apoptotic process	-5.2459	-2.87694	6/207	348,6620,6622,6812,11151,11315	APOE,SNCB,SNCA,STXBP1,CORO1A,PARK7
13_Member	GO Biological Processes	GO:1901215	negative regulation of neuron death	-5.222	-2.87531	6/209	348,6620,6622,6812,11151,11315	APOE,SNCB,SNCA,STXBP1,CORO1A,PARK7
13_Member	GO Biological Processes	GO:0032768	regulation of monooxygenase activity	-5.15032	-2.83706	4/57	348,6622,11315,23576	APOE,SNCA,PARK7,DDAH1
13_Member	GO Biological Processes	GO:0001933	negative regulation of protein phosphorylation	-5.05976	-2.78495	7/341	348,6456,6622,7345,11315,22933,23603	APOE,SH3GL2,SNCA,UCHL1,PARK7,SIRT2,CORO1C
13_Member	GO Biological Processes	GO:0030534	adult behavior	-4.94243	-2.70634	5/136	372,5413,6622,7345,11315	ARCN1,SEPTIN5,SNCA,UCHL1,PARK7
13_Member	GO Biological Processes	GO:0031333	negative regulation of protein-containing complex assembly	-4.8965	-2.66709	5/139	6622,6812,11315,22933,29767	SNCA,STXBP1,PARK7,SIRT2,TMOD2
13_Member	GO Biological Processes	GO:0031400	negative regulation of protein modification process	-4.81337	-2.6034	8/519	348,6456,6622,7345,7531,11315,22933,23603	APOE,SH3GL2,SNCA,UCHL1,YWHAE,PARK7,SIRT2,CORO1C
13_Member	GO Biological Processes	GO:0042326	negative regulation of phosphorylation	-4.74164	-2.55332	7/382	348,6456,6622,7345,11315,22933,23603	APOE,SH3GL2,SNCA,UCHL1,PARK7,SIRT2,CORO1C
13_Member	GO Biological Processes	GO:0008344	adult locomotory behavior	-4.65201	-2.48717	4/76	372,6622,7345,11315	ARCN1,SNCA,UCHL1,PARK7
13_Member	GO Biological Processes	GO:0042176	regulation of protein catabolic process	-4.64861	-2.48661	7/395	348,2670,4905,6622,7415,11315,22933	APOE,GFAP,NSF,SNCA,VCP,PARK7,SIRT2
13_Member	GO Biological Processes	GO:0051348	negative regulation of transferase activity	-4.59185	-2.44382	6/270	348,1974,6622,7345,11315,23603	APOE,EIF4A2,SNCA,UCHL1,PARK7,CORO1C
13_Member	GO Biological Processes	GO:1903715	regulation of aerobic respiration	-4.30519	-2.24406	3/33	6622,7415,11315	SNCA,VCP,PARK7
13_Member	GO Biological Processes	GO:1901214	regulation of neuron death	-4.23463	-2.18461	6/313	348,6620,6622,6812,11151,11315	APOE,SNCB,SNCA,STXBP1,CORO1A,PARK7
13_Member	GO Biological Processes	GO:0051341	regulation of oxidoreductase activity	-4.06922	-2.05699	4/107	348,6622,11315,23576	APOE,SNCA,PARK7,DDAH1
13_Member	GO Biological Processes	GO:0010506	regulation of autophagy	-4.06511	-2.05489	6/336	526,2670,6622,7345,11315,22933	ATP6V1B2,GFAP,SNCA,UCHL1,PARK7,SIRT2
13_Member	GO Biological Processes	GO:0006469	negative regulation of protein kinase activity	-4.01168	-2.01524	5/213	348,6622,7345,11315,23603	APOE,SNCA,UCHL1,PARK7,CORO1C
13_Member	GO Biological Processes	GO:1900371	regulation of purine nucleotide biosynthetic process	-3.98813	-1.99555	3/42	2023,6622,7415	ENO1,SNCA,VCP
13_Member	GO Biological Processes	GO:0030808	regulation of nucleotide biosynthetic process	-3.95739	-1.97243	3/43	2023,6622,7415	ENO1,SNCA,VCP
13_Member	GO Biological Processes	GO:0033673	negative regulation of kinase activity	-3.80347	-1.85124	5/236	348,6622,7345,11315,23603	APOE,SNCA,UCHL1,PARK7,CORO1C
13_Member	GO Biological Processes	GO:0043457	regulation of cellular respiration	-3.76115	-1.81414	3/50	6622,7415,11315	SNCA,VCP,PARK7
13_Member	GO Biological Processes	GO:0043086	negative regulation of catalytic activity	-3.55876	-1.64982	8/786	348,815,1974,6620,6622,7345,11315,23603	APOE,CAMK2A,EIF4A2,SNCB,SNCA,UCHL1,PARK7,CORO1C
13_Member	GO Biological Processes	GO:0062013	positive regulation of small molecule metabolic process	-3.54996	-1.64575	4/146	2023,6622,7415,11315	ENO1,SNCA,VCP,PARK7
13_Member	GO Biological Processes	GO:0051353	positive regulation of oxidoreductase activity	-3.5474	-1.64476	3/59	348,6622,11315	APOE,SNCA,PARK7
13_Member	GO Biological Processes	GO:0045862	positive regulation of proteolysis	-3.53235	-1.58011	6/369	348,2023,4155,6622,7415,22933	APOE,ENO1,MBP,SNCA,VCP,SIRT2
13_Member	GO Biological Processes	GO:0009896	positive regulation of catabolic process	-3.12831	-1.30583	6/503	348,4905,6622,7415,11315,22933	APOE,NSF,SNCA,VCP,PARK7,SIRT2
13_Member	GO Biological Processes	GO:0061136	regulation of proteasomal protein catabolic process	-3.11884	-1.30108	4/190	348,7415,11315,22933	APOE,VCP,PARK7,SIRT2
13_Member	GO Biological Processes	GO:0031334	positive regulation of protein-containing complex assembly	-3.08515	-1.27754	4/194	6622,6624,7415,11315	SNCA,FSCN1,VCP,PARK7
13_Member	GO Biological Processes	GO:0062012	regulation of small molecule metabolic process	-3.06792	-1.26471	5/342	348,2023,6622,7415,11315	APOE,ENO1,SNCA,VCP,PARK7
13_Member	GO Biological Processes	GO:1900542	regulation of purine nucleotide metabolic process	-3.06733	-1.26471	3/86	2023,6622,7415	ENO1,SNCA,VCP
13_Member	GO Biological Processes	GO:0006140	regulation of nucleotide metabolic process	-3.03835	-1.24189	3/88	2023,6622,7415	ENO1,SNCA,VCP
13_Member	GO Biological Processes	GO:1903578	regulation of ATP metabolic process	-3.02412	-1.22889	3/89	2023,6622,7415	ENO1,SNCA,VCP
13_Member	GO Biological Processes	GO:0051651	maintenance of location in cell	-2.96886	-1.18447	3/93	348,3098,11315	APOE,HK1,PARK7
13_Member	GO Biological Processes	GO:0006979	response to oxidative stress	-2.9422	-1.16136	5/365	348,5594,6622,11315,22933	APOE,MAPK1,SNCA,PARK7,SIRT2
13_Member	GO Biological Processes	GO:0034599	cellular response to oxidative stress	-2.89774	-1.13084	4/218	5594,6622,11315,22933	MAPK1,SNCA,PARK7,SIRT2
13_Member	GO Biological Processes	GO:1903050	regulation of proteolysis involved in cellular protein catabolic process	-2.86156	-1.10146	4/223	348,7415,11315,22933	APOE,VCP,PARK7,SIRT2
13_Member	GO Biological Processes	GO:0045732	positive regulation of protein catabolic process	-2.7918	-1.04281	4/233	348,4905,7415,22933	APOE,NSF,VCP,SIRT2
13_Member	GO Biological Processes	GO:0030162	regulation of proteolysis	-2.64093	-0.835734	7/743	348,2023,4155,6622,7415,11315,22933	APOE,ENO1,MBP,SNCA,VCP,PARK7,SIRT2
13_Member	GO Biological Processes	GO:1903362	regulation of cellular protein catabolic process	-2.63102	-0.90551	4/258	348,7415,11315,22933	APOE,VCP,PARK7,SIRT2
13_Member	GO Biological Processes	GO:0062197	cellular response to chemical stress	-2.62495	-0.900483	4/259	5594,6622,11315,22933	MAPK1,SNCA,PARK7,SIRT2
13_Member	GO Biological Processes	GO:0042177	negative regulation of protein catabolic process	-2.61106	-0.890124	3/124	6622,11315,22933	SNCA,PARK7,SIRT2
13_Member	GO Biological Processes	GO:0031331	positive regulation of cellular catabolic process	-2.59207	-0.873769	5/439	348,6622,7415,11315,22933	APOE,SNCA,VCP,PARK7,SIRT2
13_Member	GO Biological Processes	GO:0045859	regulation of protein kinase activity	-2.58021	-0.863088	6/645	60,348,6622,7345,11315,23603	ACTB,APOE,SNCA,UCHL1,PARK7,CORO1C
13_Member	GO Biological Processes	GO:0043467	regulation of generation of precursor metabolites and energy	-2.51584	-0.808637	3/134	6622,7415,11315	SNCA,VCP,PARK7
13_Member	GO Biological Processes	GO:0032434	regulation of proteasomal ubiquitin-dependent protein catabolic process	-2.48876	-0.786513	3/137	7415,11315,22933	VCP,PARK7,SIRT2
13_Member	GO Biological Processes	GO:2000377	regulation of reactive oxygen species metabolic process	-2.40293	-0.712344	3/147	6622,11315,22933	SNCA,PARK7,SIRT2
13_Member	Reactome Gene Sets	R-HSA-9612973	Autophagy	-2.37036	-0.688972	3/151	2670,7415,11315	GFAP,VCP,PARK7
13_Member	GO Biological Processes	GO:0006898	receptor-mediated endocytosis	-2.34654	-0.669173	3/154	348,1759,6622	APOE,DNM1,SNCA
13_Member	GO Biological Processes	GO:0015850	organic hydroxy compound transport	-2.33871	-0.663381	3/155	348,6622,11315	APOE,SNCA,PARK7
13_Member	GO Biological Processes	GO:1903364	positive regulation of cellular protein catabolic process	-2.32322	-0.650481	3/157	348,7415,22933	APOE,VCP,SIRT2
13_Member	GO Biological Processes	GO:0051235	maintenance of location	-2.29288	-0.62834	3/161	348,3098,11315	APOE,HK1,PARK7
13_Member	GO Biological Processes	GO:2000058	regulation of ubiquitin-dependent protein catabolic process	-2.25609	-0.5996	3/166	7415,11315,22933	VCP,PARK7,SIRT2
13_Member	GO Biological Processes	GO:0043549	regulation of kinase activity	-2.22603	-0.574824	6/763	60,348,6622,7345,11315,23603	ACTB,APOE,SNCA,UCHL1,PARK7,CORO1C
13_Member	GO Biological Processes	GO:0000302	response to reactive oxygen species	-2.22049	-0.57191	3/171	348,5594,11315	APOE,MAPK1,PARK7
13_Member	GO Biological Processes	GO:0051099	positive regulation of binding	-2.22049	-0.57191	3/171	348,11315,22933	APOE,PARK7,SIRT2
13_Member	GO Biological Processes	GO:0098657	import into cell	-2.16586	-0.521603	3/179	2670,6622,11315	GFAP,SNCA,PARK7
13_Member	GO Biological Processes	GO:0071900	regulation of protein serine/threonine kinase activity	-2.07114	-0.439649	4/372	60,348,6622,7345	ACTB,APOE,SNCA,UCHL1
13_Member	GO Biological Processes	GO:1903828	negative regulation of protein localization	-2.0403	-0.413774	3/199	348,2665,11315	APOE,GDI2,PARK7
13_Member	GO Biological Processes	GO:0043281	regulation of cysteine-type endopeptidase activity involved in apoptotic process	-2.0111	-0.389508	3/204	6622,7415,11315	SNCA,VCP,PARK7
14_Summary	KEGG Pathway	hsa00020	Citrate cycle (TCA cycle)	-6.06254	-3.50118	4/30	47,5162,8803,55753,3098,3945,5594,6622,815	ACLY,PDHB,SUCLA2,OGDHL,HK1,LDHB,MAPK1,SNCA,CAMK2A
14_Member	KEGG Pathway	hsa00020	Citrate cycle (TCA cycle)	-6.06254	-3.50118	4/30	47,5162,8803,55753	ACLY,PDHB,SUCLA2,OGDHL
14_Member	KEGG Pathway	hsa05230	Central carbon metabolism in cancer	-4.79371	-2.59315	4/70	3098,3945,5162,5594	HK1,LDHB,PDHB,MAPK1
14_Member	GO Biological Processes	GO:0006099	tricarboxylic acid cycle	-4.388	-2.299	3/31	5162,8803,55753	PDHB,SUCLA2,OGDHL
14_Member	Reactome Gene Sets	R-HSA-71406	Pyruvate metabolism and Citric Acid (TCA) cycle	-3.63786	-1.71278	3/55	3945,5162,8803	LDHB,PDHB,SUCLA2
14_Member	GO Biological Processes	GO:0009060	aerobic respiration	-3.49435	-1.6029	4/151	5162,6622,8803,55753	PDHB,SNCA,SUCLA2,OGDHL
14_Member	GO Biological Processes	GO:0045333	cellular respiration	-3.20657	-1.36909	4/180	5162,6622,8803,55753	PDHB,SNCA,SUCLA2,OGDHL
14_Member	KEGG Pathway	hsa04922	Glucagon signaling pathway	-2.79359	-1.04281	3/107	815,3945,5162	CAMK2A,LDHB,PDHB
14_Member	GO Biological Processes	GO:0015980	energy derivation by oxidation of organic compounds	-2.72528	-0.983903	4/243	5162,6622,8803,55753	PDHB,SNCA,SUCLA2,OGDHL
14_Member	Reactome Gene Sets	R-HSA-1428517	The citric acid (TCA) cycle and respiratory electron transport	-2.17254	-0.527422	3/178	3945,5162,8803	LDHB,PDHB,SUCLA2
15_Summary	WikiPathways	WP2371	Parkinson's disease pathway	-5.97176	-3.34935	5/84	5413,6622,7317,7345,11315,815,5594,7415	SEPTIN5,SNCA,UBA1,UCHL1,PARK7,CAMK2A,MAPK1,VCP
15_Member	WikiPathways	WP2371	Parkinson's disease pathway	-5.97176	-3.34935	5/84	5413,6622,7317,7345,11315	SEPTIN5,SNCA,UBA1,UCHL1,PARK7
15_Member	KEGG Pathway	hsa05022	Pathways of neurodegeneration - multiple diseases	-5.08453	-2.79475	8/476	815,5413,5594,6622,7317,7345,7415,11315	CAMK2A,SEPTIN5,MAPK1,SNCA,UBA1,UCHL1,VCP,PARK7
15_Member	KEGG Pathway	hsa05012	Parkinson disease	-4.62821	-2.4773	6/266	815,5413,6622,7317,7345,11315	CAMK2A,SEPTIN5,SNCA,UBA1,UCHL1,PARK7
15_Member	WikiPathways	WP2359	Parkin-ubiquitin proteasomal system pathway	-3.32842	-1.4717	3/70	5413,6622,7317	SEPTIN5,SNCA,UBA1
16_Summary	Reactome Gene Sets	R-HSA-3371556	Cellular response to heat stress	-5.84679	-3.26978	5/89	815,5594,7415,7531,10808,1808,4905,5864,2023,11151,60,526,6620,10963,2775,1973,1937,4976,5162	CAMK2A,MAPK1,VCP,YWHAE,HSPH1,DPYSL2,NSF,RAB3A,ENO1,CORO1A,ACTB,ATP6V1B2,SNCB,STIP1,GNAO1,EIF4A1,EEF1G,OPA1,PDHB
16_Member	Reactome Gene Sets	R-HSA-3371556	Cellular response to heat stress	-5.84679	-3.26978	5/89	815,5594,7415,7531,10808	CAMK2A,MAPK1,VCP,YWHAE,HSPH1
16_Member	WikiPathways	WP2380	Brain-derived neurotrophic factor (BDNF) signaling pathway	-4.82224	-2.60589	5/144	815,1808,4905,5594,5864	CAMK2A,DPYSL2,NSF,MAPK1,RAB3A
16_Member	Reactome Gene Sets	R-HSA-9637690	Response of Mtb to phagocytosis	-4.78717	-2.5897	3/23	2023,5594,11151	ENO1,MAPK1,CORO1A
16_Member	Reactome Gene Sets	R-HSA-9635486	Infection with Mycobacterium tuberculosis	-4.57194	-2.43208	3/27	2023,5594,11151	ENO1,MAPK1,CORO1A
16_Member	WikiPathways	WP2636	Common pathways underlying drug addiction	-3.98813	-1.99555	3/42	60,815,5594	ACTB,CAMK2A,MAPK1
16_Member	Reactome Gene Sets	R-HSA-9656223	Signaling by RAF1 mutants	-3.95739	-1.97243	3/43	60,815,5594	ACTB,CAMK2A,MAPK1
16_Member	Reactome Gene Sets	R-HSA-6802946	Signaling by moderate kinase activity BRAF mutants	-3.84149	-1.88041	3/47	60,815,5594	ACTB,CAMK2A,MAPK1
16_Member	Reactome Gene Sets	R-HSA-6802949	Signaling by RAS mutants	-3.84149	-1.88041	3/47	60,815,5594	ACTB,CAMK2A,MAPK1
16_Member	Reactome Gene Sets	R-HSA-6802955	Paradoxical activation of RAF signaling by kinase inactive BRAF	-3.84149	-1.88041	3/47	60,815,5594	ACTB,CAMK2A,MAPK1
16_Member	Reactome Gene Sets	R-HSA-9649948	Signaling downstream of RAS mutants	-3.84149	-1.88041	3/47	60,815,5594	ACTB,CAMK2A,MAPK1
16_Member	Reactome Gene Sets	R-HSA-8953897	Cellular responses to stimuli	-3.61502	-1.69444	8/771	526,815,5594,6620,7415,7531,10808,10963	ATP6V1B2,CAMK2A,MAPK1,SNCB,VCP,YWHAE,HSPH1,STIP1
16_Member	KEGG Pathway	hsa04921	Oxytocin signaling pathway	-3.46193	-1.57313	4/154	60,815,2775,5594	ACTB,CAMK2A,GNAO1,MAPK1
16_Member	Reactome Gene Sets	R-HSA-6802952	Signaling by BRAF and RAF1 fusions	-3.38435	-1.50871	3/67	60,815,5594	ACTB,CAMK2A,MAPK1
16_Member	Canonical Pathways	M121	PID MTOR 4PATHWAY	-3.34678	-1.48582	3/69	1973,5594,7531	EIF4A1,MAPK1,YWHAE
16_Member	Reactome Gene Sets	R-HSA-3371453	Regulation of HSF1-mediated heat shock response	-3.34678	-1.48582	3/69	5594,7531,10808	MAPK1,YWHAE,HSPH1
16_Member	Reactome Gene Sets	R-HSA-6802957	Oncogenic MAPK signaling	-3.09702	-1.28816	3/84	60,815,5594	ACTB,CAMK2A,MAPK1
16_Member	Reactome Gene Sets	R-HSA-2262752	Cellular responses to stress	-2.92427	-1.15046	7/757	526,815,5594,7415,7531,10808,10963	ATP6V1B2,CAMK2A,MAPK1,VCP,YWHAE,HSPH1,STIP1
16_Member	KEGG Pathway	hsa04916	Melanogenesis	-2.86553	-1.10431	3/101	815,2775,5594	CAMK2A,GNAO1,MAPK1
16_Member	KEGG Pathway	hsa04722	Neurotrophin signaling pathway	-2.66181	-0.927913	3/119	815,5594,7531	CAMK2A,MAPK1,YWHAE
16_Member	Reactome Gene Sets	R-HSA-5663202	Diseases of signal transduction by growth factor receptors and second messengers	-2.61781	-0.894378	5/433	60,815,1937,5594,7415	ACTB,CAMK2A,EEF1G,MAPK1,VCP
16_Member	KEGG Pathway	hsa04114	Oocyte meiosis	-2.54358	-0.832502	3/131	815,5594,7531	CAMK2A,MAPK1,YWHAE
16_Member	WikiPathways	WP5094	Orexin receptor pathway	-2.33871	-0.663381	3/155	4976,5162,5594	OPA1,PDHB,MAPK1
16_Member	Reactome Gene Sets	R-HSA-109581	Apoptosis	-2.15922	-0.517176	3/180	4976,5594,7531	OPA1,MAPK1,YWHAE
16_Member	KEGG Pathway	hsa05152	Tuberculosis	-2.15922	-0.517176	3/180	815,5594,11151	CAMK2A,MAPK1,CORO1A
16_Member	KEGG Pathway	hsa04360	Axon guidance	-2.14606	-0.506959	3/182	815,1808,5594	CAMK2A,DPYSL2,MAPK1
16_Member	KEGG Pathway	hsa05205	Proteoglycans in cancer	-2.00535	-0.385396	3/205	60,815,5594	ACTB,CAMK2A,MAPK1
17_Summary	Reactome Gene Sets	R-HSA-5653656	Vesicle-mediated transport	-5.77671	-3.24697	10/673	60,348,372,1759,2665,4905,5864,6456,7531,10808	ACTB,APOE,ARCN1,DNM1,GDI2,NSF,RAB3A,SH3GL2,YWHAE,HSPH1
17_Member	Reactome Gene Sets	R-HSA-5653656	Vesicle-mediated transport	-5.77671	-3.24697	10/673	60,348,372,1759,2665,4905,5864,6456,7531,10808	ACTB,APOE,ARCN1,DNM1,GDI2,NSF,RAB3A,SH3GL2,YWHAE,HSPH1
17_Member	Reactome Gene Sets	R-HSA-199991	Membrane Trafficking	-4.19787	-2.15438	8/634	60,372,1759,2665,4905,5864,6456,7531	ACTB,ARCN1,DNM1,GDI2,NSF,RAB3A,SH3GL2,YWHAE
17_Member	Reactome Gene Sets	R-HSA-8876198	RAB GEFs exchange GTP for GDP on RABs	-3.01007	-1.21726	3/90	2665,5864,7531	GDI2,RAB3A,YWHAE
17_Member	Reactome Gene Sets	R-HSA-9007101	Rab regulation of trafficking	-2.61106	-0.890124	3/124	2665,5864,7531	GDI2,RAB3A,YWHAE
18_Summary	GO Biological Processes	GO:0048168	regulation of neuronal synaptic plasticity	-5.37973	-2.98243	4/50	348,815,5864,6622,60,2783,7531,10419,29767,6812,11151,11315,4976	APOE,CAMK2A,RAB3A,SNCA,ACTB,GNB2,YWHAE,PRMT5,TMOD2,STXBP1,CORO1A,PARK7,OPA1
18_Member	GO Biological Processes	GO:0048168	regulation of neuronal synaptic plasticity	-5.37973	-2.98243	4/50	348,815,5864,6622	APOE,CAMK2A,RAB3A,SNCA
18_Member	WikiPathways	WP289	Myometrial relaxation and contraction pathways	-5.22905	-2.87531	4/158	60,815,2783,7531	ACTB,CAMK2A,GNB2,YWHAE
18_Member	GO Biological Processes	GO:0008277	regulation of G protein-coupled receptor signaling pathway	-3.6554	-1.72535	4/137	815,6622,10419,29767	CAMK2A,SNCA,PRMT5,TMOD2
18_Member	GO Biological Processes	GO:0043269	regulation of ion transport	-3.17685	-1.34471	7/685	815,5864,6622,6812,7531,11151,11315	CAMK2A,RAB3A,SNCA,STXBP1,YWHAE,CORO1A,PARK7
18_Member	GO Biological Processes	GO:0051924	regulation of calcium ion transport	-3.05187	-1.25049	3/251	815,6622,7531	CAMK2A,SNCA,YWHAE
18_Member	GO Biological Processes	GO:0022898	regulation of transmembrane transporter activity	-2.94672	-1.16351	3/273	60,6622,7531	ACTB,SNCA,YWHAE
18_Member	GO Biological Processes	GO:0032409	regulation of transporter activity	-2.80869	-1.05529	3/305	60,6622,7531	ACTB,SNCA,YWHAE
18_Member	GO Biological Processes	GO:0007006	mitochondrial membrane organization	-2.72583	-0.983903	3/113	815,4976,6622	CAMK2A,OPA1,SNCA
18_Member	GO Biological Processes	GO:0007005	mitochondrion organization	-2.68405	-0.945891	5/418	815,4976,5864,6622,11315	CAMK2A,OPA1,RAB3A,SNCA,PARK7
18_Member	GO Biological Processes	GO:0051051	negative regulation of transport	-2.49305	-0.788829	5/463	348,6622,7531,11151,11315	APOE,SNCA,YWHAE,CORO1A,PARK7
18_Member	GO Biological Processes	GO:0010959	regulation of metal ion transport	-2.46571	-0.765429	3/403	815,6622,7531	CAMK2A,SNCA,YWHAE
18_Member	GO Biological Processes	GO:1903169	regulation of calcium ion transmembrane transport	-2.33094	-0.657278	3/156	6622,7531,11151	SNCA,YWHAE,CORO1A
18_Member	GO Biological Processes	GO:1904062	regulation of cation transmembrane transport	-2.14947	-0.5095	4/353	6622,7531,11151,11315	SNCA,YWHAE,CORO1A,PARK7
18_Member	GO Biological Processes	GO:0034762	regulation of transmembrane transport	-2.08501	-0.451814	5/580	60,6622,7531,11151,11315	ACTB,SNCA,YWHAE,CORO1A,PARK7
19_Summary	GO Biological Processes	GO:0050806	positive regulation of synaptic transmission	-4.86646	-2.64363	5/141	2670,2752,5594,6622,6812,815,10419,22933	GFAP,GLUL,MAPK1,SNCA,STXBP1,CAMK2A,PRMT5,SIRT2
19_Member	GO Biological Processes	GO:0050806	positive regulation of synaptic transmission	-4.86646	-2.64363	5/141	2670,2752,5594,6622,6812	GFAP,GLUL,MAPK1,SNCA,STXBP1
19_Member	GO Biological Processes	GO:0060291	long-term synaptic potentiation	-3.61461	-1.69444	3/56	2670,5594,6622	GFAP,MAPK1,SNCA
19_Member	WikiPathways	WP5083	Neuroinflammation and glutamatergic signaling	-3.57278	-1.65745	4/144	815,2670,2752,5594	CAMK2A,GFAP,GLUL,MAPK1
19_Member	GO Biological Processes	GO:0014013	regulation of gliogenesis	-2.87796	-1.11561	3/100	2670,10419,22933	GFAP,PRMT5,SIRT2
19_Member	GO Biological Processes	GO:0010001	glial cell differentiation	-2.24888	-0.594157	3/167	2670,5594,22933	GFAP,MAPK1,SIRT2
20_Summary	GO Biological Processes	GO:0043604	amide biosynthetic process	-4.67617	-2.49975	8/474	47,1937,1973,1974,2193,2617,5162,197322,5464,5594,11315,815	ACLY,EEF1G,EIF4A1,EIF4A2,FARSA,GARS1,PDHB,ACSF3,PPA1,MAPK1,PARK7,CAMK2A
20_Member	GO Biological Processes	GO:0043604	amide biosynthetic process	-4.67617	-2.49975	8/474	47,1937,1973,1974,2193,2617,5162,197322	ACLY,EEF1G,EIF4A1,EIF4A2,FARSA,GARS1,PDHB,ACSF3
20_Member	Reactome Gene Sets	R-HSA-72766	Translation	-4.09081	-2.05162	6/291	1937,1973,1974,2193,2617,5464	EEF1G,EIF4A1,EIF4A2,FARSA,GARS1,PPA1
20_Member	WikiPathways	WP4566	Translation inhibitors in chronically activated PDGFRA cells	-3.81413	-1.85838	3/48	1973,1974,5594	EIF4A1,EIF4A2,MAPK1
20_Member	WikiPathways	WP107	Translation factors	-3.68571	-1.75232	3/53	1937,1973,1974	EEF1G,EIF4A1,EIF4A2
20_Member	GO Biological Processes	GO:0006518	peptide metabolic process	-2.89428	-1.03473	6/489	1937,1973,1974,2193,2617,11315	EEF1G,EIF4A1,EIF4A2,FARSA,GARS1,PARK7
20_Member	GO Biological Processes	GO:0006412	translation	-2.87038	-1.01645	5/332	1937,1973,1974,2193,2617	EEF1G,EIF4A1,EIF4A2,FARSA,GARS1
20_Member	GO Biological Processes	GO:0043043	peptide biosynthetic process	-2.72171	-0.902653	5/359	1937,1973,1974,2193,2617	EEF1G,EIF4A1,EIF4A2,FARSA,GARS1
20_Member	Reactome Gene Sets	R-HSA-913531	Interferon Signaling	-2.0403	-0.413774	3/199	815,1973,1974	CAMK2A,EIF4A1,EIF4A2
